# Supplementary material for: N-Bromosuccinimide–carboxylic acid combination: mild and efficient access to dibromination of unsaturated carbonyl compounds
Source: Royal Society of Chemistry journal article supplement (doi:10.1039/c3ra40360b), 2013-01-01

Electronic Supplementary Material (ESI) for RSC Advances  
This journal is © The Royal Society of Chemistry 2012

---

***N*-bromosuccinimide/carboxylic acid combination: mild and efficient  
access to dibromination of unsaturated carbonyl compounds**

Hongxun Xue, Hui Tan, Donglei Wei, Ying Wei, Shaoxia Lin, Fushun Liang,\* and  
Baoyong Zhao\*

*Department of Chemistry, Northeast Normal University, Changchun 130024, China*

[liangfs112@nenu.edu.cn](mailto:liangfs112@nenu.edu.cn)

**Table of contents**

|                                                                                                                             |    |
|-----------------------------------------------------------------------------------------------------------------------------|----|
| I. General.. ..                                                                                                             | S2 |
| II. Synthesis and analytical data of <b>2a-p</b> , <b>3a-c</b> and <b>4a-c</b> .....                                        | S2 |
| III. Copies of <sup>1</sup> H and <sup>13</sup> C NMR spectra for compounds <b>2a-p</b> , <b>3a-c</b> and <b>4a-c</b> ..... | S9 |

## I. General

All reagents were purchased from commercial sources and used without treatment, unless otherwise indicated.  $^1\text{H}$  NMR and  $^{13}\text{C}$  NMR spectra were recorded at 25 °C on a Varian 500 MHz and 125 MHz, respectively, and TMS as internal standard. Elemental analyses were measured on an E-2400 analyzer (Perkin-Elmer). Mass spectra were recorded on Agilent 1100 LCMsD mass spectrometer. All the reactions were performed under normal conditions, without the necessity for inert gas protection.

## II. Synthesis and analytical data of 2a-p, 3a-c and 4a-c.

General procedure for the Synthesis of **2** (**2a** as an example): 1.0 mmol chalcone **1a** was dispensed in 2 mL THF. 2.2 mmol NBS and 0.2 mmol benzoic acid was added and stirring for 6.0 h at ambient temperature. After the starting material **1a** was consumed as indicated by TLC, the reaction mixture was poured into water (10 mL) and extracted with  $\text{CH}_2\text{Cl}_2$  ( $3 \times 10$  mL). The combined organic phase was washed with water ( $3 \times 10$  mL), and dried over anhydrous  $\text{MgSO}_4$ . The solvent was removed under reduced pressure, and the residue was purified by recrystallization in dichloromethane and petroleum ether to give compound **2a** (366 mg, 91%) as a white solid.

### 2,3-dibromo-3-(4-chlorophenyl)-1-phenylpropan-1-one (**2a**)

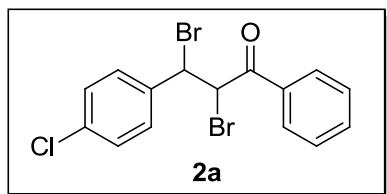

White solid. m.p. 184-186 °C.  $^1\text{H}$  NMR ( $\text{CDCl}_3$ , 500 MHz)  $\delta$  = 5.60-5.63 (d,  $J$  = 11.0 Hz, 1H), 5.76-5.78 (d,  $J$  = 11.5 Hz, 1H), 7.40-7.42 (m, 2H), 7.46-7.48 (m, 2H), 7.54-7.57 (t,  $J$  = 8.0 Hz, 2H), 7.66-7.68 (d,  $J$  = 8.0 Hz, 1H), 8.08-8.10 (t,  $J$  = 8.0 Hz, 2H).  $^{13}\text{C}$  NMR

Electronic Supplementary Material (ESI) for RSC Advances  
This journal is © The Royal Society of Chemistry 2012

---

(DMSO-*d*<sub>6</sub>, 125 MHz)  $\delta$  = 48.8, 73.3, 121.5, 129.3, 129.4, 130.7, 131.2, 134.5, 135.2, 141.5, 193.8. MS calcd *m/z* 399.8, Found 401.2 [(M + 1)]<sup>+</sup>. Anal. Calcd for C<sub>15</sub>H<sub>11</sub>Br<sub>2</sub>ClO: C, 44.76; H, 2.75; Found: C, 44.88; H, 2.72.

### 2,3-dibromo-1,3-diphenylpropan-1-one (2b)

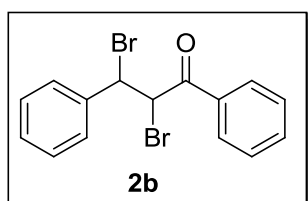

White solid. m.p. 166-168 °C. <sup>1</sup>H NMR (CDCl<sub>3</sub>, 500 MHz)  $\delta$  = 5.64-5.66 (d, *J* = 11.5 Hz, 1H), 5.82-5.84 (d, *J* = 11.5 Hz, 1H), 7.39-7.45 (m, 3H), 7.52-7.57 (m, 4H), 7.66-7.68 (t, 1H), 8.10-8.12 (d, *J* = 8.0 Hz, 2H). <sup>13</sup>C NMR (CDCl<sub>3</sub>, 125 MHz)  $\delta$  = 46.7, 49.7, 128.3, 128.8, 128.8, 128.9, 129.2, 134.1, 134.3, 138.1, 191.1. MS calcd *m/z* 365.9, Found 367.1 [(M + 1)]<sup>+</sup>. Anal. Calcd for C<sub>15</sub>H<sub>12</sub>Br<sub>2</sub>O: C, 48.95; H, 3.29; Found: C, 49.16; H, 3.34.

### 2,3-dibromo-1-phenyl-3-p-tolylpropan-1-one (2c)

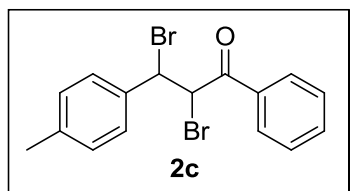

White solid. 187-189 °C. <sup>1</sup>H NMR (CDCl<sub>3</sub>, 500 MHz)  $\delta$  = 2.39 (s, 3H), 5.63-5.65 (d, *J* = 11.0 Hz, 1H), 5.82-5.84 (d, *J* = 11.5 Hz, 1H), 7.22-7.25 (t, *J* = 5.5 Hz, 2H), 7.41-7.42 (d, *J* = 8.0 Hz, 2H), 7.53-7.56 (t, *J* = 7.5 Hz, 2H), 7.64-7.67 (t, *J* = 7.0 Hz, 1H), 8.09-8.11 (d, *J* = 7.5 Hz, 2H). <sup>13</sup>C NMR (CDCl<sub>3</sub>, 125 MHz)  $\delta$  = 46.8, 49.9, 128.1, 128.8, 128.9, 129.5, 134.1, 134.4, 135.2, 135, 139.3, 191.2. MS calcd *m/z* 379.9, Found 381.0 [(M + 1)]<sup>+</sup>. Anal. Calcd for C<sub>16</sub>H<sub>14</sub>Br<sub>2</sub>O: C, 50.29; H, 3.69; Found: C, 50.52; H, 3.62.

### 2,3-dibromo-3-(4-methoxyphenyl)-1-phenylpropan-1-one (2d)

Electronic Supplementary Material (ESI) for RSC Advances  
This journal is © The Royal Society of Chemistry 2012

---

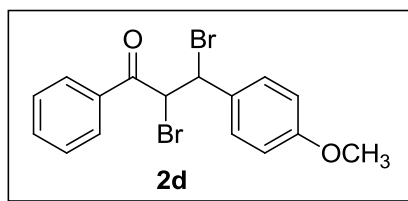

White solid. 149-151 °C.  $^1\text{H}$  NMR ( $\text{CDCl}_3$ , 500 MHz)  $\delta$  = 3.98 (s, 3H), 6.02-6.04 (d,  $J$  = 10.5 Hz, 1H), 6.20-6.22 (d,  $J$  = 9.5 Hz, 1H), 6.96-6.97 (d,  $J$  = 8.5 Hz, 1H), 7.00-7.03 (t,  $J$  = 7.5 Hz, 1H), 7.35-7.39 (m, 1H), 7.45-7.46 (d,  $J$  = 7.5 Hz, 1H), 7.53-7.56 (m, 2H), 7.63-7.67 (m, 1H), 8.09-8.11 (t,  $J$  = 7.0 Hz, 2H).  $^{13}\text{C}$  NMR ( $\text{CDCl}_3$ , 125 MHz)  $\delta$  = 45.5, 55.9, 111.7, 120.9, 126.3, 128.9, 128.9, 134.0, 134.7, 191.5 (one carbon peak was missed due to overlap). MS calcd  $m/z$  395.9, Found 397.2  $[(M + 1)]^+$ . Anal. Calcd for  $\text{C}_{16}\text{H}_{14}\text{Br}_2\text{O}_2$ : C, 48.27; H, 3.54; Found: C, 48.51; H, 3.59.

**3-(benzo[d][1,3]dioxol-5-yl)-2,3-dibromo-1-phenylpropan-1-one (2e)**

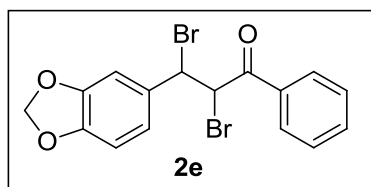

White solid. m.p. 194-196 °C.  $^1\text{H}$  NMR ( $\text{CDCl}_3$ , 500 MHz)  $\delta$  = 5.59-5.62 (d,  $J$  = 11.0 Hz, 1H), 5.75-5.77 (d,  $J$  = 11.5 Hz, 1H), 6.03 (s, 2H), 6.81-6.83 (d,  $J$  = 7.0 Hz, 1H), 6.99-7.01 (t,  $J$  = 5.5 Hz, 2H), 7.54-7.57 (t,  $J$  = 8.0 Hz, 2H), 7.65-7.66 (d,  $J$  = 7.0 Hz, 1H), 8.08-8.10 (d,  $J$  = 7.5 Hz, 2H).  $^{13}\text{C}$  NMR ( $\text{CDCl}_3$ , 125 MHz)  $\delta$  = 47.0, 50.3, 101.5, 108.0, 108.2, 122.6, 128.8, 128.9, 131.8, 134.1, 134.5, 148.1, 148.4, 191.2. MS calcd  $m/z$  409.9, Found 411.1  $[(M + 1)]^+$ . Anal. Calcd for  $\text{C}_{16}\text{H}_{12}\text{Br}_2\text{O}_3$ : C, 46.64; H, 2.94; Found: C, 46.75; H, 2.90.

**2,3-dibromo-3-(4-bromophenyl)-1-phenylpropan-1-one (2f)**

Electronic Supplementary Material (ESI) for RSC Advances  
This journal is © The Royal Society of Chemistry 2012

---

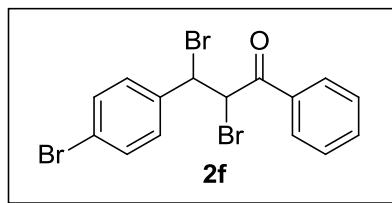

White solid. m.p. 186-188 °C.  $^1\text{H}$  NMR ( $\text{CDCl}_3$ , 500 MHz)  $\delta$  = 5.59-5.61 (d,  $J$  = 11.0 Hz, 1H), 5.75-5.77 (d,  $J$  = 11.5 Hz, 1H), 7.39-7.41 (d,  $J$  = 8.5 Hz, 2H), 7.54-7.58 (m, 4H), 7.61-7.68 (m, 1H), 8.08-8.09 (d,  $J$  = 7.0 Hz, 2H).  $^{13}\text{C}$  NMR ( $\text{CDCl}_3$ , 125 MHz)  $\delta$  = 46.5, 48.6, 123.3, 128.8, 129.0, 129.9, 132.0, 134.2, 137.3, 190.8 (one carbon peak was missed due to overlap).. MS calcd  $m/z$  443.8, Found 445.0  $[(M + 1)]^+$ . Anal. Calcd for  $\text{C}_{15}\text{H}_{11}\text{Br}_3\text{O}$ : C, 40.31; H, 2.48; Found: C, 40.59; H, 2.42.

**2,3-dibromo-3-(4-fluorophenyl)-1-phenylpropan-1-one (2g)**

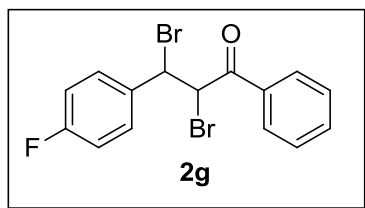

White solid. m.p. 156-158 °C.  $^1\text{H}$  NMR ( $\text{CDCl}_3$ , 500 MHz)  $\delta$  = 5.63–5.65 (d,  $J$  = 11.0 Hz, 1H), 5.76-5.78 (d,  $J$  = 11.5 Hz, 1H), 7.10-7.14 (t,  $J$  = 8.5 Hz, 2H), 7.50-7.52 (m, 2H), 7.53- 7.57 (m, 2H), 7.66-7.67 (d,  $J$  = 7.5 Hz, 1H), 8.09-8.10 (d,  $J$  = 7.5 Hz, 2H).  $^{13}\text{C}$  NMR ( $\text{CDCl}_3$ , 125 MHz)  $\delta$  = 48.8, 48.9, 115.8, 116.0, 128.9, 129.0, 130.2, 130.2, 134.2, 161.9, 163.9, 191.0. MS calcd  $m/z$  383.9, Found 385.0  $(M + 1)]^+$ . Anal. Calcd for  $\text{C}_{15}\text{H}_{11}\text{Br}_2\text{FO}$ : C, 46.67; H, 2.87; Found: C, 46.80; H, 2.90.

**2,3-dibromo-3-(3-nitrophenyl)-1-phenylpropan-1-one (2h)**

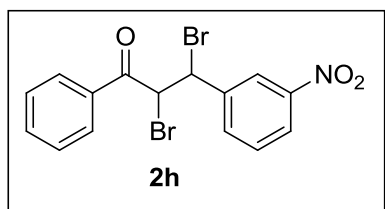

White solid. m.p. 188-190 °C.  $^1\text{H}$  NMR ( $\text{CDCl}_3$ , 500 MHz)  $\delta$  = 5.70–5.72 (d,  $J$  = 11.0 Hz,

Electronic Supplementary Material (ESI) for RSC Advances

This journal is © The Royal Society of Chemistry 2012

1H), 5.79-5.82 (d,  $J = 11.0$  Hz, 1H), 7.57-7.65 (m, 3H), 7.68-7.71 (t,  $J = 7.5$  Hz, 1H), 7.83-7.85 (d,  $J = 7.5$  Hz, 1H), 8.11-8.12 (m, 2H), 8.25-8.27 (m, 1H). 8.43 (t,  $J = 2.0$  Hz, 1H).  $^{13}\text{C}$  NMR ( $\text{CDCl}_3$ , 125 MHz)  $\delta = 46.1, 47.3, 123.3, 124.1, 128.9, 129.1, 129.9, 133.9, 134.5, 134.5, 140.4, 148.4, 190.4$ . MS calcd  $m/z$  410.9, Found 412.2  $[(M + 1)]^+$ .  
Anal. Calcd for  $\text{C}_{15}\text{H}_{11}\text{Br}_2\text{NO}_3$ : C, 43.62; H, 2.68; Found: C, 43.85; H, 2.73.

### 2,3-dibromo-3-(naphthalen-2-yl)-1-phenylpropan-1-one (2i)

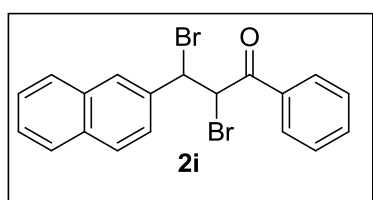

White solid. m.p. 216-218 °C.  $^1\text{H}$  NMR ( $\text{CDCl}_3$ , 500 MHz)  $\delta = 6.11-6.13$  (d,  $J = 11.0$  Hz, 1H), 6.63-6.65 (d,  $J = 11.5$  Hz, 1H), 6.74 (d,  $J = 9.0$  Hz, 1H), 7.54-7.60 (m, 4H), 7.65-7.70 (m, 2H), 7.90-7.93 (m, 3H), 8.16-8.18 (d,  $J = 7.5$  Hz, 2H), 8.26-8.28 (d,  $J = 8.5$  Hz, 1H).  $^{13}\text{C}$  NMR ( $\text{CDCl}_3$ , 125 MHz)  $\delta = 44.1, 45.9, 122.5, 125.3, 125.7, 126.2, 127.0, 128.9, 128.9, 129.0, 129.8, 130.9, 133.7, 133.7, 134.1, 134.4, 191.2$ . MS calcd  $m/z$  415.9, Found 417.1  $[(M + 1)]^+$ . Anal. Calcd for  $\text{C}_{19}\text{H}_{14}\text{Br}_2\text{O}$ : C, 54.58; H, 3.37; Found: C, 54.73; H, 3.45.

### 3,4-dibromo-4-phenylbutan-2-one (2j)

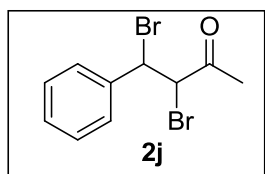

White solid. m.p. 200-202 °C.  $^1\text{H}$  NMR ( $\text{CDCl}_3$ , 500 MHz)  $\delta = 2.49$  (s, 6H), 3.44 (s, 3H), 4.92-4.94 (d,  $J = 11.5$  Hz, 1H), 5.30-5.33 (d,  $J = 11.5$  Hz, 1H), 7.38-7.41 (m, 5H).  $^{13}\text{C}$  NMR ( $\text{CDCl}_3$ , 125 MHz)  $\delta = 26.6, 49.4, 52.7, 128.0, 128.8, 129.3, 137.7, 198.4$ . MS calcd  $m/z$  303.9, Found 305.0  $[(M + 1)]^+$ . Anal. Calcd for  $\text{C}_{10}\text{H}_{10}\text{Br}_2\text{O}$ : C, 39.25; H, 3.29; Found: C, 39.46; H, 3.35.

**2,3-dibromo-1-(4-chlorophenyl)-3-phenylpropan-1-one (2k)**

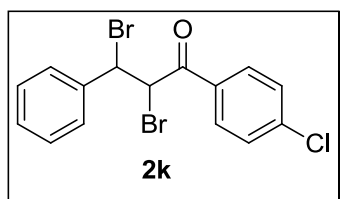

White solid. m.p. 203-205 °C.  $^1\text{H}$  NMR ( $\text{CDCl}_3$ , 500 MHz)  $\delta$  = 5.61-5.63 (d,  $J$  = 11.5 Hz, 1H), 5.75-5.77 (d,  $J$  = 11.5 Hz, 1H), 7.39-7.45 (m, 3H), 7.51-7.54 (m, 4H), 8.03-8.05 (t,  $J$  = 2.0 Hz, 2H).  $^{13}\text{C}$  NMR ( $\text{CDCl}_3$ , 125 MHz)  $\delta$  = 46.6, 49.6, 128.3, 128.8, 129.3, 130.2, 132.6, 137.9, 140.8, 190.0 (one carbon peak was missed due to overlap). MS calcd  $m/z$  399.8, Found 401.1  $[(M + 1)]^+$ . Anal. Calcd for  $\text{C}_{15}\text{H}_{11}\text{Br}_2\text{ClO}$ : C, 44.76; H, 2.75; Found: C, 44.55; H, 2.70.

**2,3-dibromo-1-(4-bromophenyl)-3-phenylpropan-1-one (2l)**

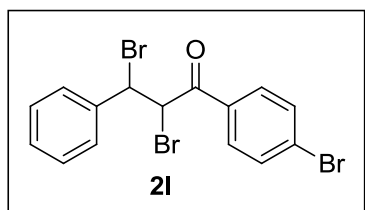

White solid. m.p. 199-201 °C.  $^1\text{H}$  NMR ( $\text{CDCl}_3$ , 500 MHz)  $\delta$  = 5.61-5.63 (d,  $J$  = 11.5 Hz, 1H), 5.74-5.76 (d,  $J$  = 11.5 Hz, 1H), 7.37-7.44 (m, 3H), 7.50-7.52 (d,  $J$  = 7.5 Hz, 2H), 7.68-7.01 (d,  $J$  = 8.5 Hz, 2H), 7.95-7.96 (d,  $J$  = 9.0 Hz, 2H).  $^{13}\text{C}$  NMR ( $\text{CDCl}_3$ , 125 MHz)  $\delta$  = 46.7, 49.6, 128.3, 128.8, 129.3, 129.5, 130.3, 132.3, 133.1, 138.0, 190.2. MS calcd  $m/z$  443.8, Found 445.1  $[(M + 1)]^+$ . Anal. Calcd for  $\text{C}_{15}\text{H}_{11}\text{Br}_3\text{O}$ : C, 40.31; H, 2.48; Found: C, 40.16; H, 2.42.

**2,3-dibromo-3-phenyl-1-(p-tolyl)propan-1-one (2m)**

Electronic Supplementary Material (ESI) for RSC Advances  
This journal is © The Royal Society of Chemistry 2012

---

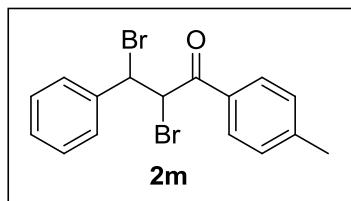

White solid. m.p. 188-190 °C.  $^1\text{H}$  NMR ( $\text{CDCl}_3$ , 500 MHz)  $\delta$  = 3.46 (s, 3H), 5.63-5.65 (d,  $J$  = 11.0 Hz, 1H), 5.80-5.83 (d,  $J$  = 11.0 Hz, 1H), 7.34-7.44 (m, 5H), 7.52-7.53 (d,  $J$  = 7.0 Hz, 2H), 8.00-8.01 (d,  $J$  = 8.5 Hz, 2H).  $^{13}\text{C}$  NMR ( $\text{CDCl}_3$ , 125 MHz)  $\delta$  = 21.8, 46.7, 49.8, 128.3, 128.8, 129.0, 129.2, 129.7, 131.8, 138.3, 145.3, 190.7. MS calcd  $m/z$  379.9, Found 381.0  $[(M + 1)]^+$ . Anal. Calcd for  $\text{C}_{16}\text{H}_{14}\text{Br}_2\text{O}$ : C, 50.29; H, 3.69; Found: C, 50.42; H, 3.75.

**ethyl 2,3-dibromo-3-phenylpropanoate (2n)**

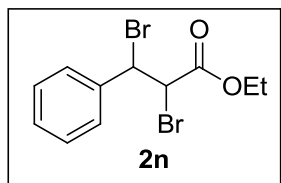

White solid. m.p. 89-91 °C.  $^1\text{H}$  NMR ( $\text{CDCl}_3$ , 500 MHz)  $\delta$  = 1.36-1.39 (t,  $J$  = 7.0 Hz, 3H), 4.34-4.38 (m, 2H), 4.84-4.87 (d,  $J$  = 12.0 Hz, 1H), 5.36-5.38 (d,  $J$  = 12.0 Hz, 1H), 7.35-7.42 (m, 5H).  $^{13}\text{C}$  NMR ( $\text{CDCl}_3$ , 125 MHz)  $\delta$  = 13.9, 47.0, 50.7, 62.6, 128.0, 128.9, 129.3, 137.6, 167.7. MS calcd  $m/z$  333.9, Found 335.2  $[(M + 1)]^+$ . Anal. Calcd for  $\text{C}_{11}\text{H}_{12}\text{Br}_2\text{O}_2$ : C, 39.32; H, 3.60; Found: C, 39.54; H, 3.65.

**(E)-4,5-dibromo-1,5-diphenylpent-1-en-3-one (2o)**

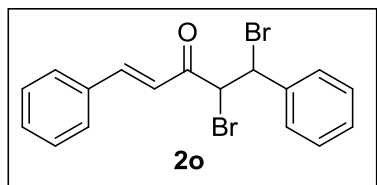

White solid. m.p. 150-152 °C.  $^1\text{H}$  NMR ( $\text{CDCl}_3$ , 500 MHz)  $\delta$  = 5.21-5.24 (d,  $J$  = 11.5 Hz, 1H), 5.48-5.50 (d,  $J$  = 11.5 Hz, 1H), 6.96-6.99 (d,  $J$  = 16 Hz, 1H), 7.38-7.49 (m, 8H), 7.64-7.66 (m, 2H), 7.86-7.89 (d,  $J$  = 16 Hz, 1H).  $^{13}\text{C}$  NMR ( $\text{CDCl}_3$ , 125 MHz)  $\delta$  = 49.4, 51.5, 122.1, 128.1, 128.1, 128.7, 128.8, 128.8, 129.0, 129.2, 131.2, 133.9, 138.1,

Electronic Supplementary Material (ESI) for RSC Advances

This journal is © The Royal Society of Chemistry 2012

146.0, 189.8. MS calcd  $m/z$  391.9, Found 393.0  $[(M + 1)]^+$ . Anal. Calcd for  $C_{17}H_{14}Br_2O$ :

C, 51.81; H, 3.58; Found: C, 51.92; H, 3.66.

**(E)-4,5-dibromo-1-phenyl-5-(p-tolyl)pent-1-en-3-one (2p)**

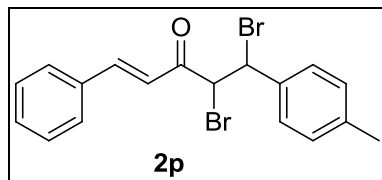

White solid. m.p. 178-180 °C.  $^1H$  NMR ( $CDCl_3$ , 500 MHz)  $\delta$  = 2.38 (s, 3H), 5.21-5.23 (d,  $J$  = 11.5 Hz, 1H), 5.47-5.49 (d,  $J$  = 11.5 Hz, 1H), 6.90-6.99 (m, 1H), 7.22-7.26 (m, 2H), 7.36-7.38 (d,  $J$  = 8.0 Hz, 2H), 7.44-7.45 (m, 3H), 7.64-7.66 (m, 2H), 7.85-7.88 (d,  $J$  = 16 Hz, 1H).  $^{13}C$  NMR ( $CDCl_3$ , 125 MHz)  $\delta$  = 21.3, 49.6, 51.6, 122.0, 128.0, 128.7, 129.0, 129.6, 131.2, 133.9, 135.1, 139.3, 146.0, 189.9. MS calcd  $m/z$  405.9, Found 407.0  $[(M + 1)]^+$ . Anal. Calcd for  $C_{18}H_{16}Br_2O$ : C, 52.97; H, 3.95; Found: C, 52.72; H, 3.89.

**2-bromo-3-(4-chlorophenyl)-3-hydroxy-1-phenylpropan-1-one (3a)**

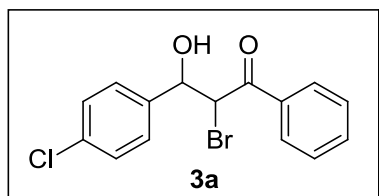

White solid.  $^1H$  NMR ( $CDCl_3$ , 500 MHz)  $\delta$  = 3.45-3.46 (d,  $J$  = 5.0 Hz, 1H), 5.12-5.14 (d,  $J$  = 11.5 Hz, 1H), 5.29-5.32 (m, 1H), 7.36-7.38 (d,  $J$  = 8.5 Hz, 2H), 7.49-7.54 (m, 4H), 7.62-7.65 (t,  $J$  = 7.5 Hz, 1H), 8.00-8.02 (t,  $J$  = 7.0 Hz, 2H). MS calcd  $m/z$  337.9, Found 339.2  $[(M + 1)]^+$ . Anal. Calcd for  $C_{15}H_{12}BrClO_2$ : C, 53.05; H, 3.56; Found: C, 53.30; H, 3.64.

**3-bromo-2-hydroxy-1-phenyl-3-(thiophen-2-yl)propan-1-one (3b)**

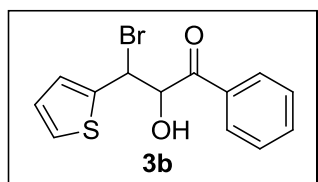

Electronic Supplementary Material (ESI) for RSC Advances  
This journal is © The Royal Society of Chemistry 2012

---

White solid. m.p. 101-103 °C.  $^1\text{H}$  NMR ( $\text{CDCl}_3$ , 500 MHz)  $\delta$  = 3.08-3.81 (d,  $J$  = 5.5 Hz, 1H), 5.25-5.27 (d,  $J$  = 8.0 Hz, 1H), 5.25-5.61 (m, 1H), 6.98-7.00 (m, 1H), 7.14-7.15 (d,  $J$  = 3.0 Hz, 1H), 7.30-7.31 (m, 1H), 7.47-7.50 (t,  $J$  = 7.5 Hz, 2H), 7.59-7.62 (t,  $J$  = 7.5 Hz, 1H), 8.00-8.02 (t,  $J$  = 8.0 Hz, 2H).  $^{13}\text{C}$  NMR ( $\text{CDCl}_3$ , 125 MHz)  $\delta$  = 47.9, 71.2, 125.6, 126.3, 126.6, 128.8, 128.9, 134.2, 134.3, 142.8, 194.4. MS calcd  $m/z$  309.9, Found 311.4  $[(M + 1)]^+$ . Anal. Calcd for  $\text{C}_{13}\text{H}_{11}\text{BrO}_2\text{S}$ : C, 50.17; H, 3.56; Found: C, 50.30; H, 3.62.

**2,3-dichloro-1,3-diphenylpropan-1-one (4a)**

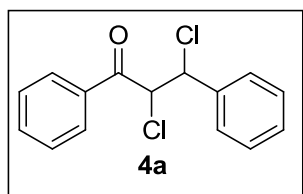

White solid. m.p. 117-119 °C.  $^1\text{H}$  NMR ( $\text{CDCl}_3$ , 500 MHz)  $\delta$  = 5.46-5.48 (d,  $J$  = 10.5 Hz, 1H), 5.49-5.51 (d,  $J$  = 10.5 Hz, 1H), 7.41-7.46 (m, 3H), 7.45-7.47 (m, 2H), 7.52-7.57 (m, 4H), 7.65-7.68 (t,  $J$  = 7.5 Hz, 1H), 8.08-8.10 (t,  $J$  = 7.5 Hz, 2H).  $^{13}\text{C}$  NMR ( $\text{CDCl}_3$ , 125 MHz)  $\delta$  = 56.9, 60.0, 60.6, 63.5, 127.8, 128.1, 128.3, 128.4, 128.6, 128.7, 128.8, 128.9, 129.1, 129.3, 129.9, 134.1, 134.2, 134.6, 137.0, 191.3. MS calcd  $m/z$  278.0, Found 279.3  $[(M + 1)]^+$ . Anal. Calcd for  $\text{C}_{15}\text{H}_{12}\text{Cl}_2\text{O}$ : C, 64.54; H, 4.33; Found: C, 64.76; H, 4.41.

**2,3-dichloro-3-(4-chlorophenyl)-1-phenylpropan-1-one (4b)**

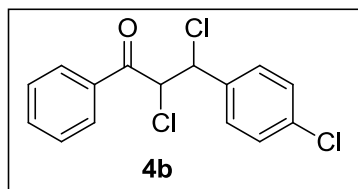

White solid. m.p. 180-183 °C.  $^1\text{H}$  NMR ( $\text{CDCl}_3$ , 500 MHz)  $\delta$  = 5.42-5.44 (d,  $J$  = 10.5 Hz, 1H), 5.45-5.47 (d,  $J$  = 10.5 Hz, 1H), 7.40-7.42 (m, 2H), 7.45-7.47 (m, 2H), 7.54-7.57 (m, 2H), 7.66-7.69 (m, 1H), 8.07-8.08 (t,  $J$  = 7.5 Hz, 2H).  $^{13}\text{C}$  NMR ( $\text{CDCl}_3$ , 125 MHz)  $\delta$  = 56.7, 59.1, 128.9, 128.9, 129.0, 129.6, 134.3, 135.2, 135.5, 190.9 (one carbon peak

Electronic Supplementary Material (ESI) for RSC Advances

This journal is © The Royal Society of Chemistry 2012

---

was missed due to overlap). MS calcd  $m/z$  311.9, Found 313.2  $[(M + 1)]^+$ . Anal. Calcd for  $C_{15}H_{11}Cl_3O$ : C, 57.45; H, 3.54; Found: C, 57.65; H, 3.61.

**2,3-dichloro-1-phenyl-3-(p-tolyl)propan-1-one (4c)**

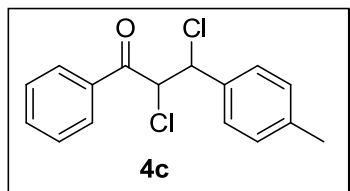

White solid. m.p. 172-174 °C.  $^1H$  NMR ( $CDCl_3$ , 500 MHz) 2.39 (s, 3H), 5.44-5.46 (d,  $J$  = 10.5 Hz, 1H), 5.48-5.51 (d,  $J$  = 10.5 Hz, 1H), 7.24-7.25 (d,  $J$  = 9.5 Hz, 2H), 7.40-7.42 (d,  $J$  = 8.0 Hz, 2H), 7.53-7.56 (t,  $J$  = 8.0 Hz, 2H), 7.64-7.67 (m, 1H), 8.07-8.09 (m, 2H). MS calcd  $m/z$  292.0, Found 293.3  $[(M + 1)]^+$ . Anal. Calcd for  $C_{16}H_{14}Cl_2O$ ; C, 65.55; H, 4.81; Found: C, 65.32; H, 4.73.

Electronic Supplementary Material (ESI) for RSC Advances  
This journal is © The Royal Society of Chemistry 2012

---

**III. Copies of  $^1\text{H}$  and  $^{13}\text{C}$  NMR spectra for compounds 2a-p, 3a-c and 4a-c.**



Electronic Supplementary Material (ESI) for RSC Advances  
This journal is © The Royal Society of Chemistry 2012

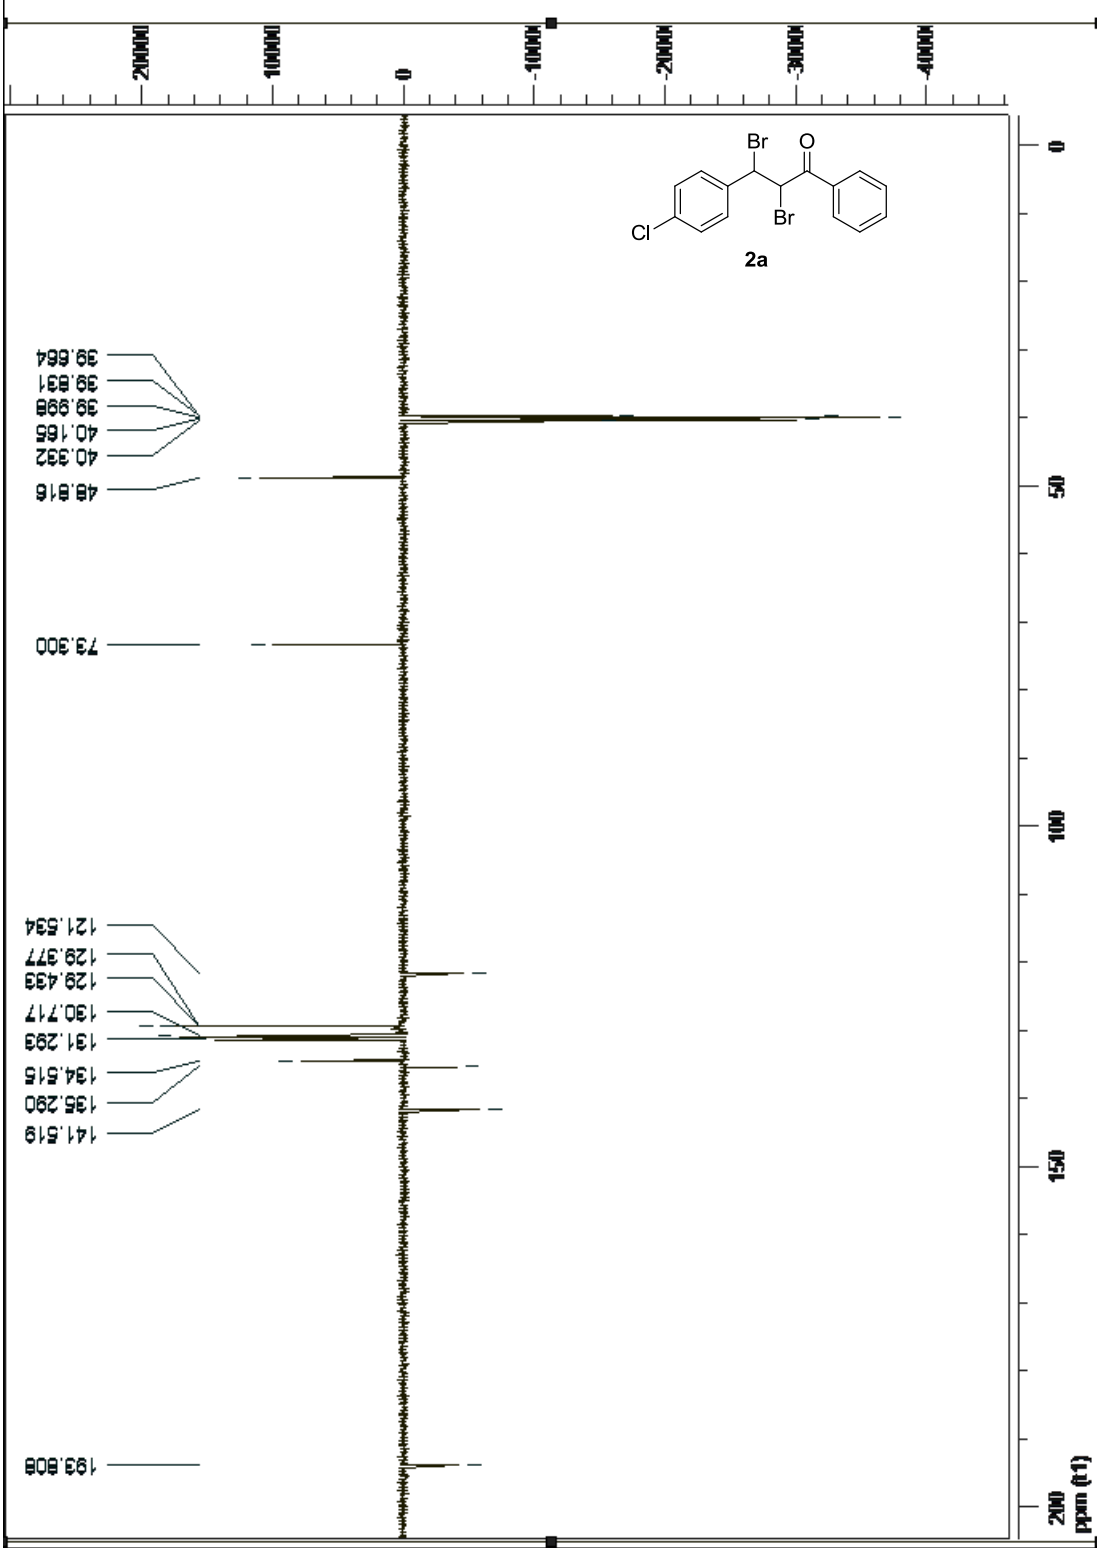

Electronic Supplementary Material (ESI) for RSC Advances  
This journal is © The Royal Society of Chemistry 2012

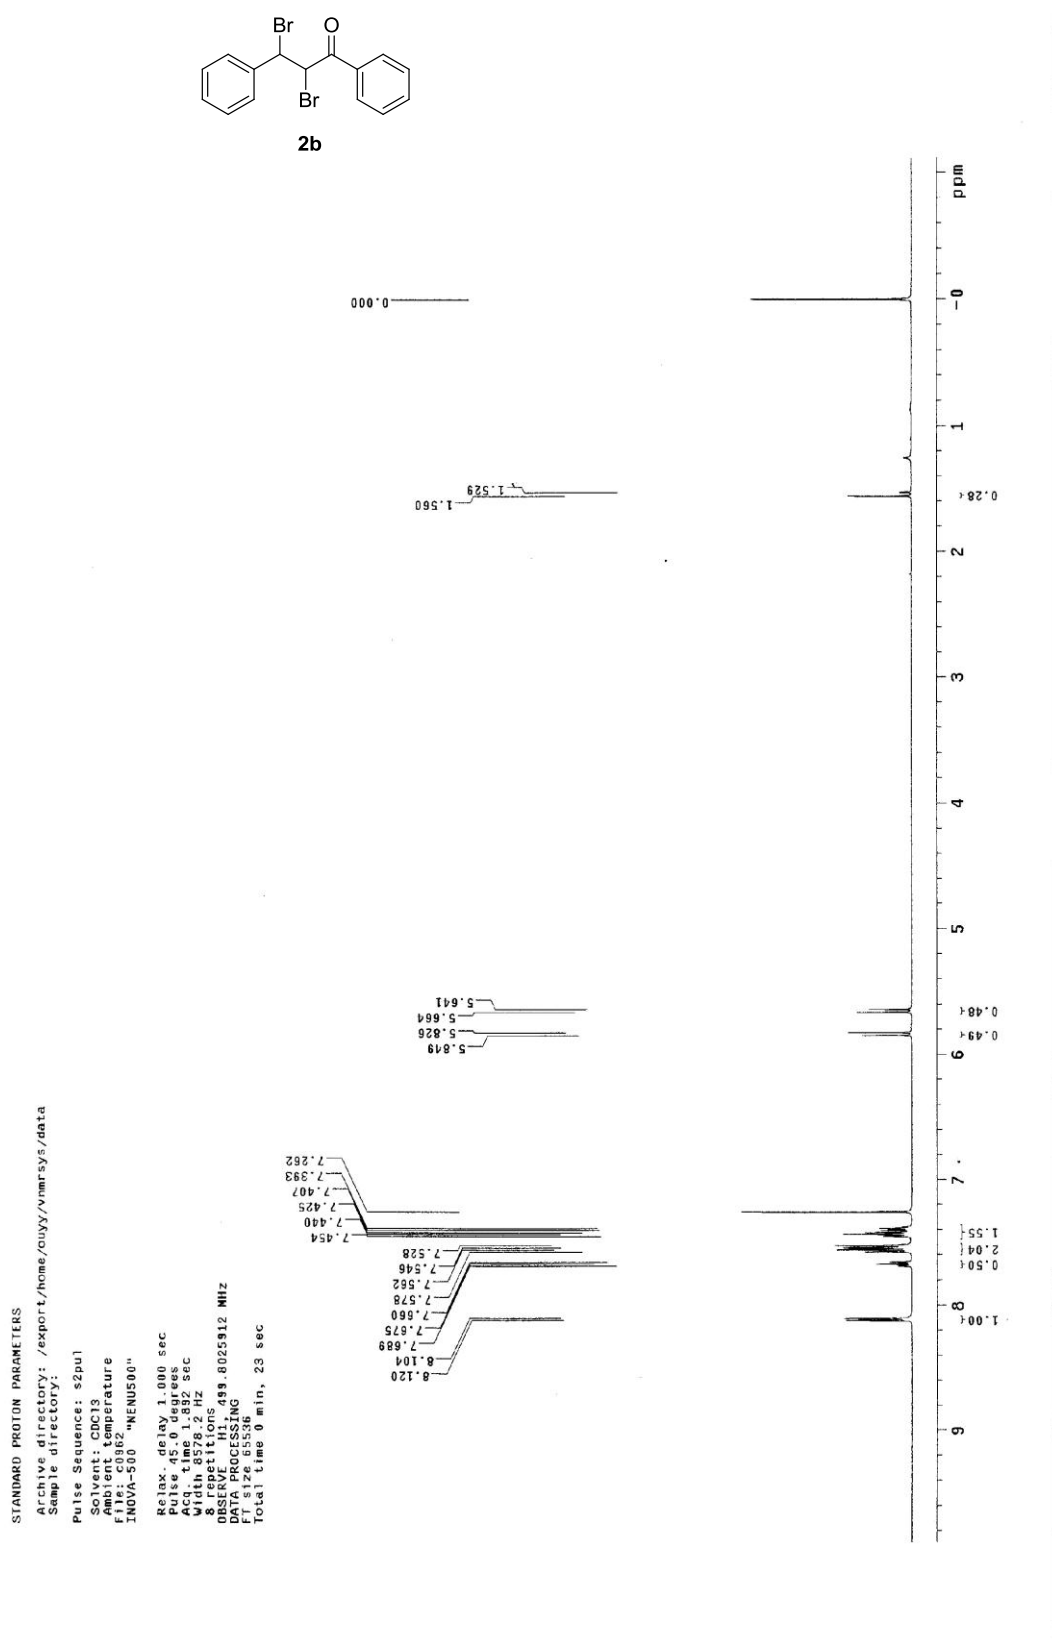

Electronic Supplementary Material (ESI) for RSC Advances  
This journal is © The Royal Society of Chemistry 2012

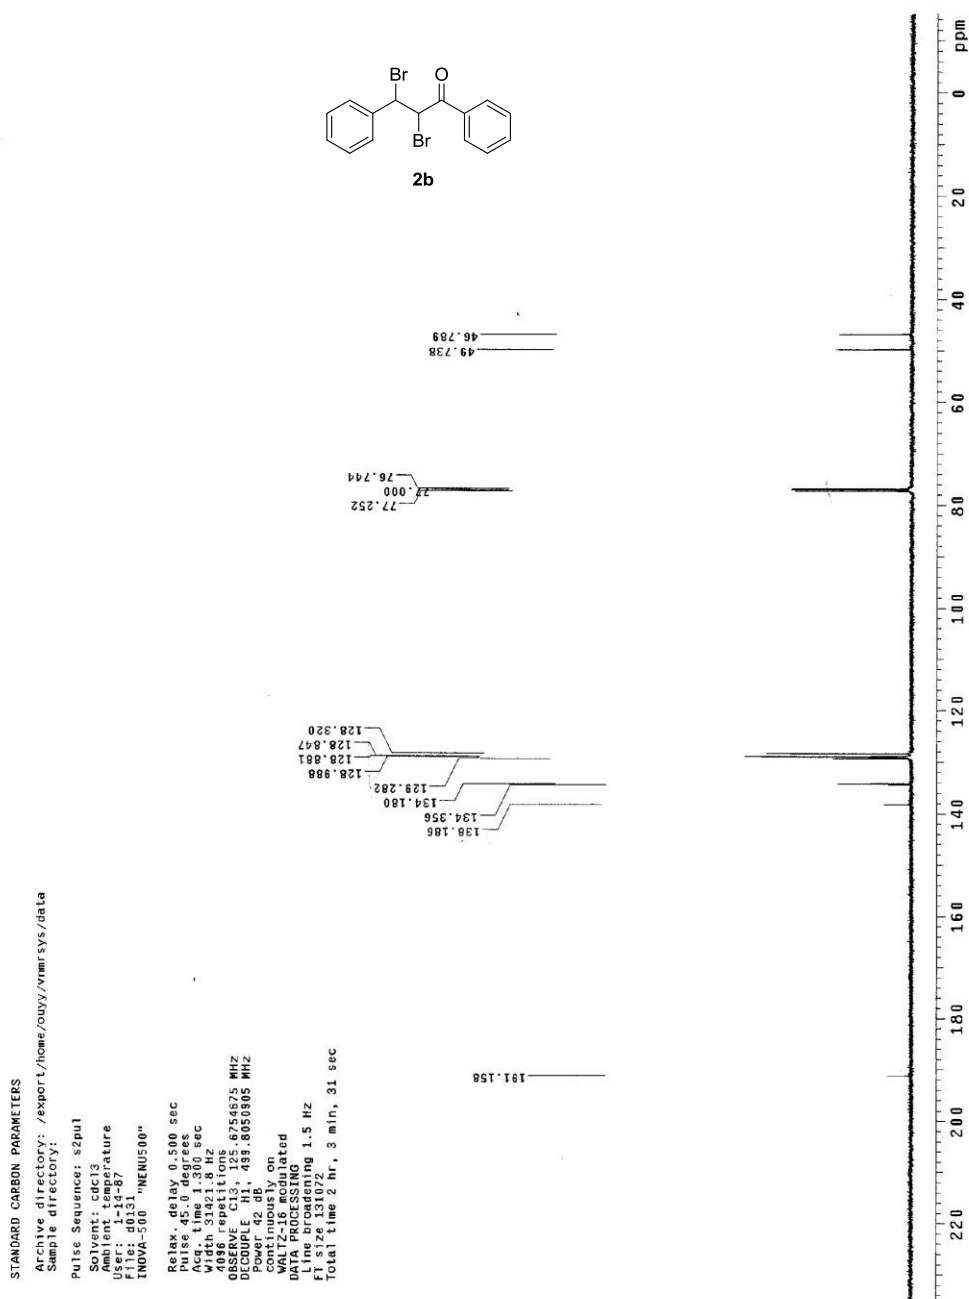



Electronic Supplementary Material (ESI) for RSC Advances  
This journal is © The Royal Society of Chemistry 2012

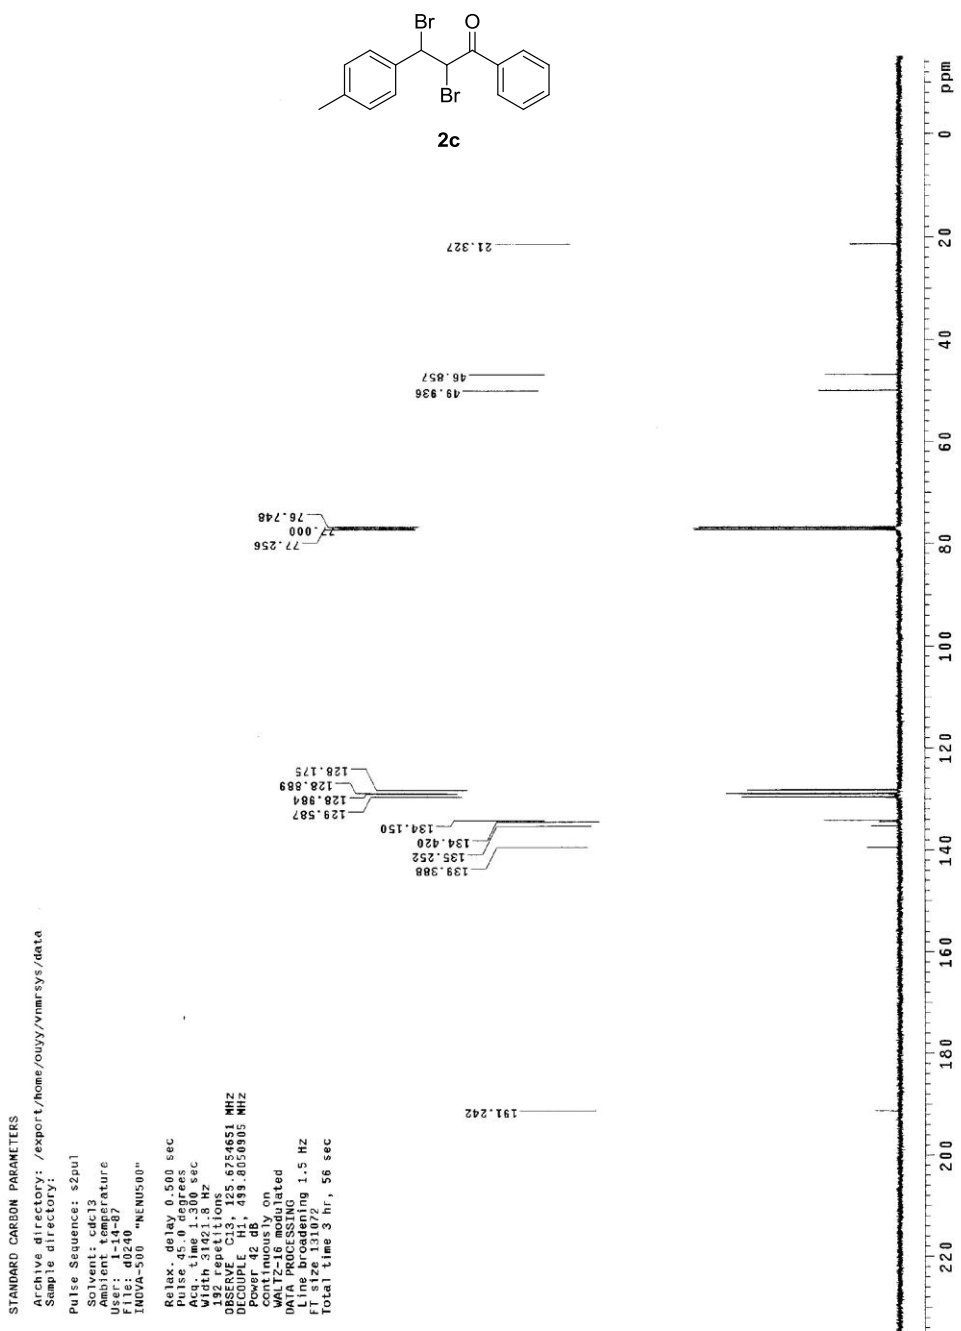

Electronic Supplementary Material (ESI) for RSC Advances  
This journal is © The Royal Society of Chemistry 2012

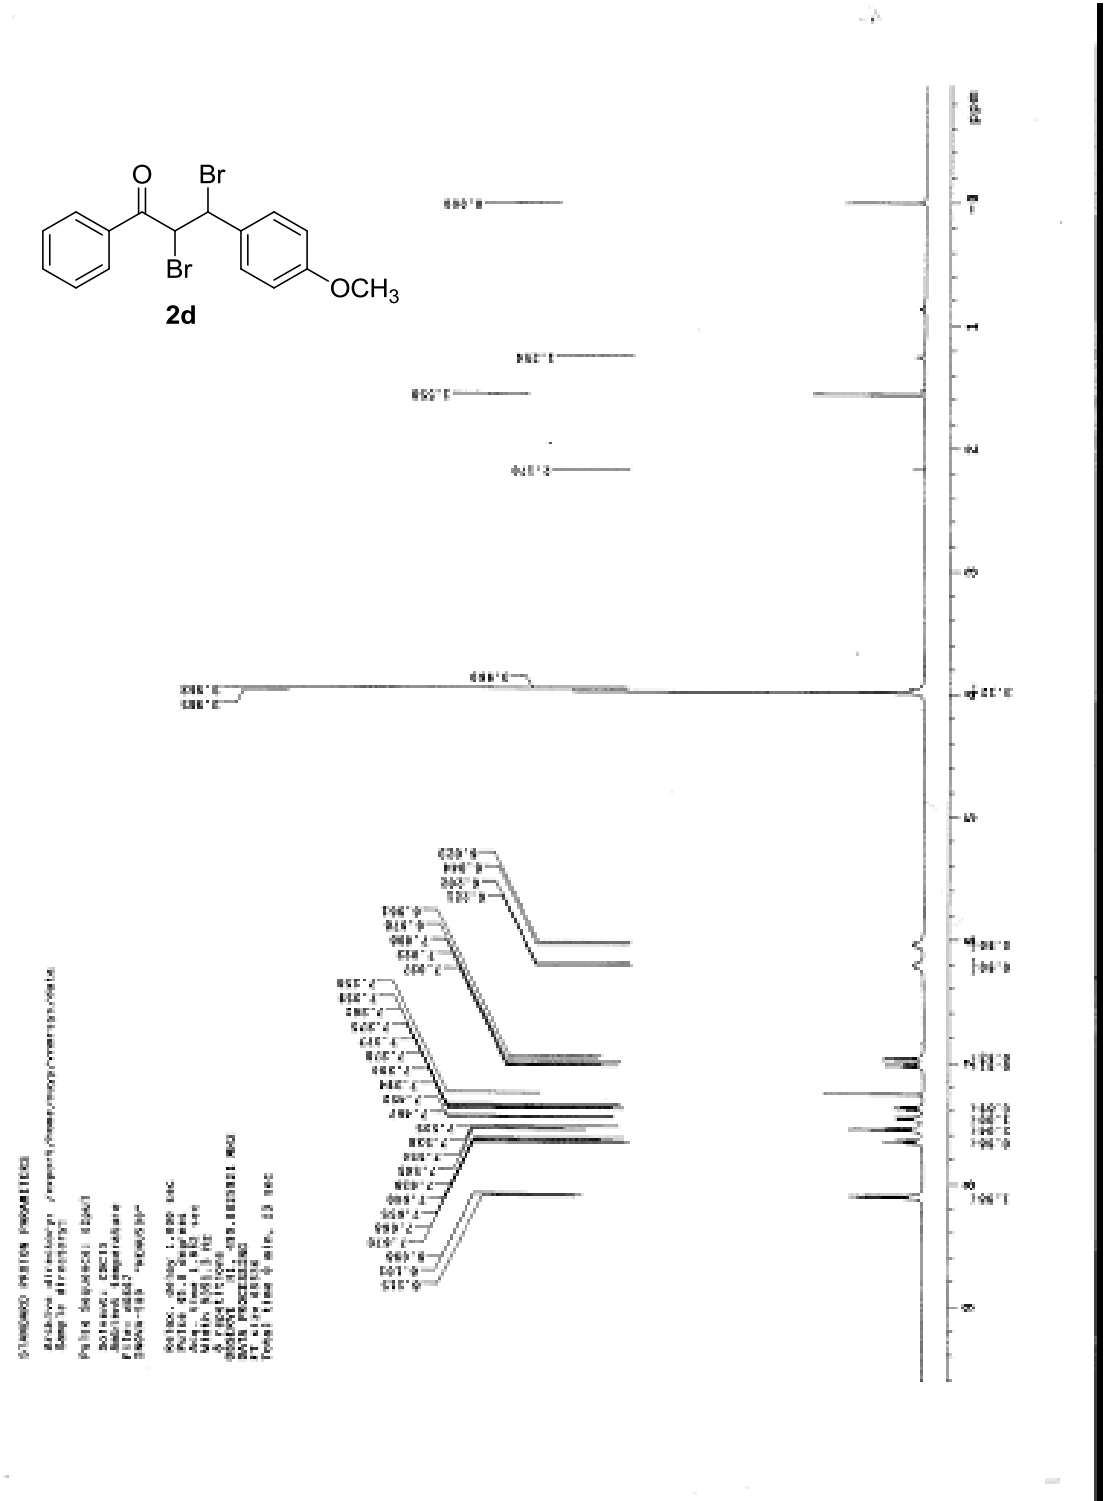

Electronic Supplementary Material (ESI) for RSC Advances  
This journal is © The Royal Society of Chemistry 2012

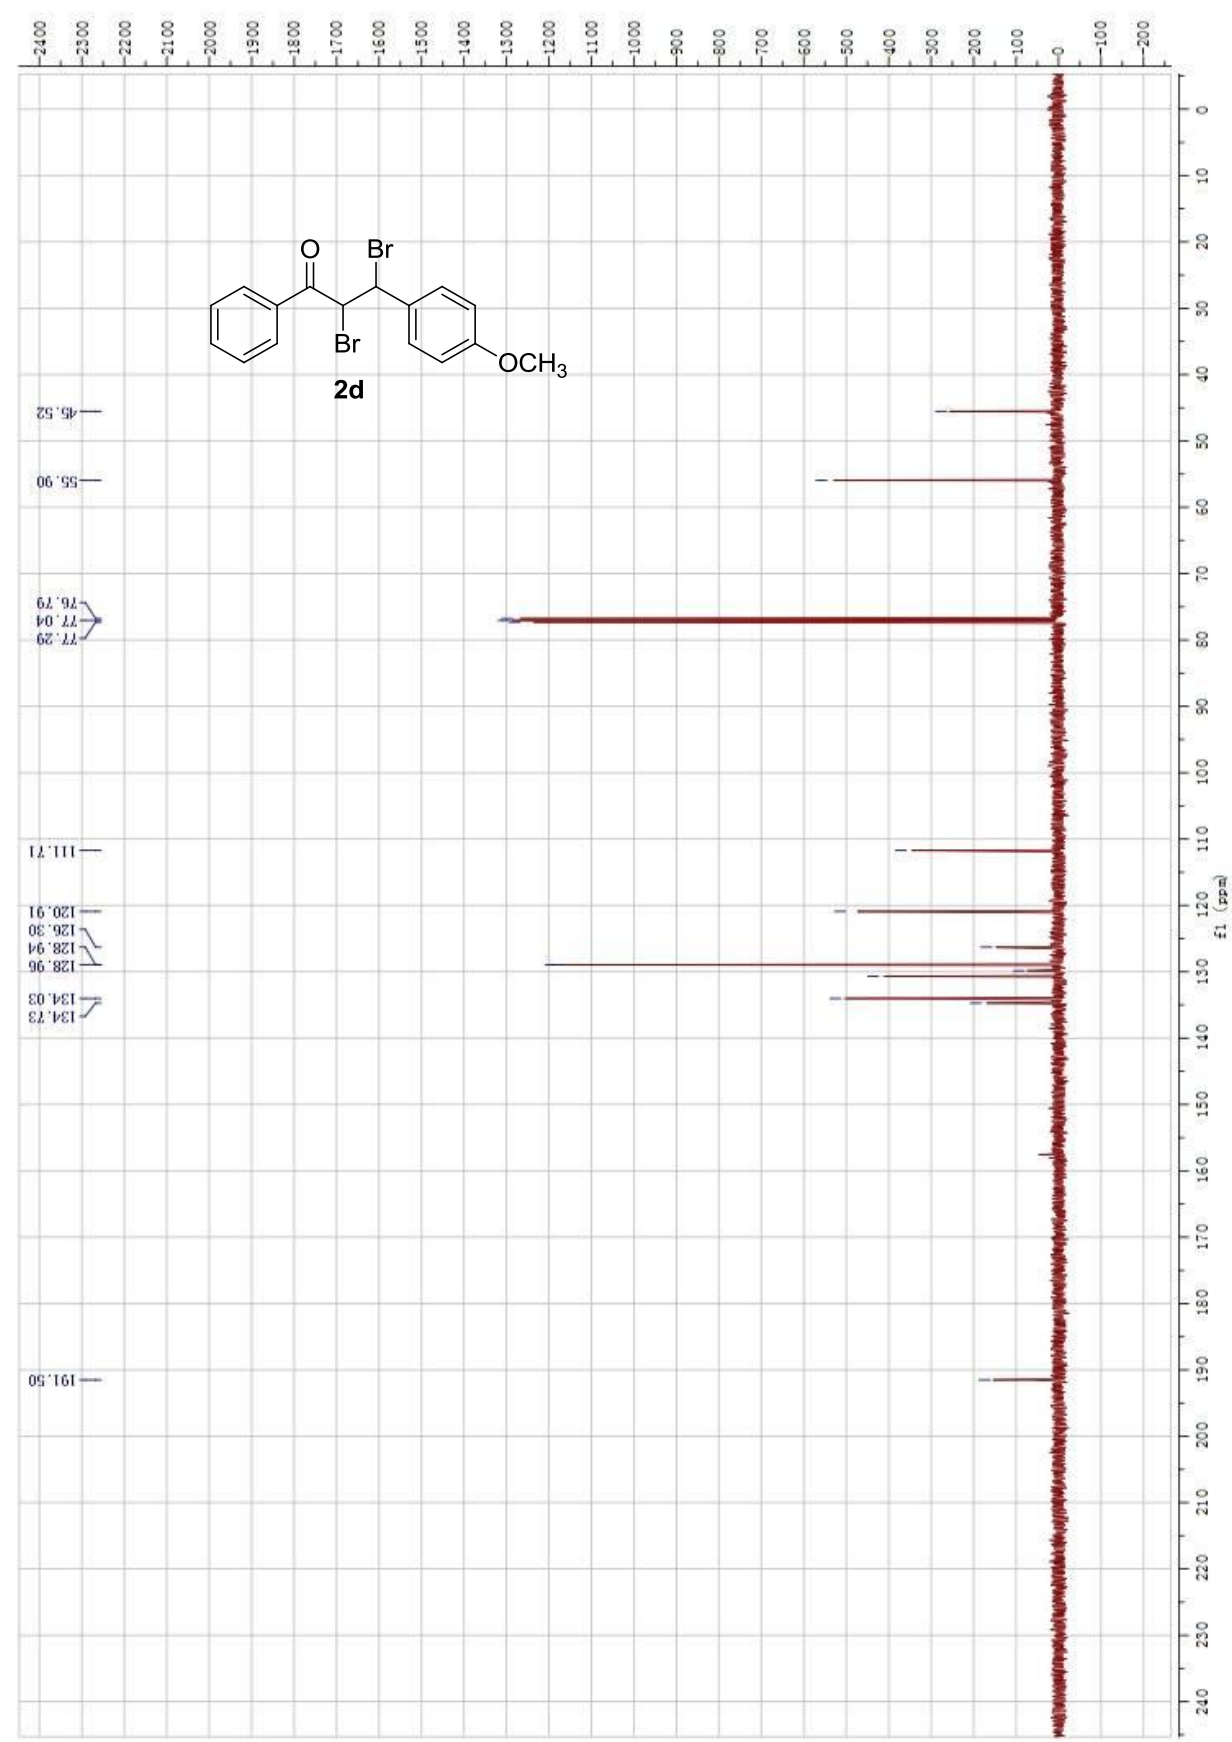

Electronic Supplementary Material (ESI) for RSC Advances  
This journal is © The Royal Society of Chemistry 2012

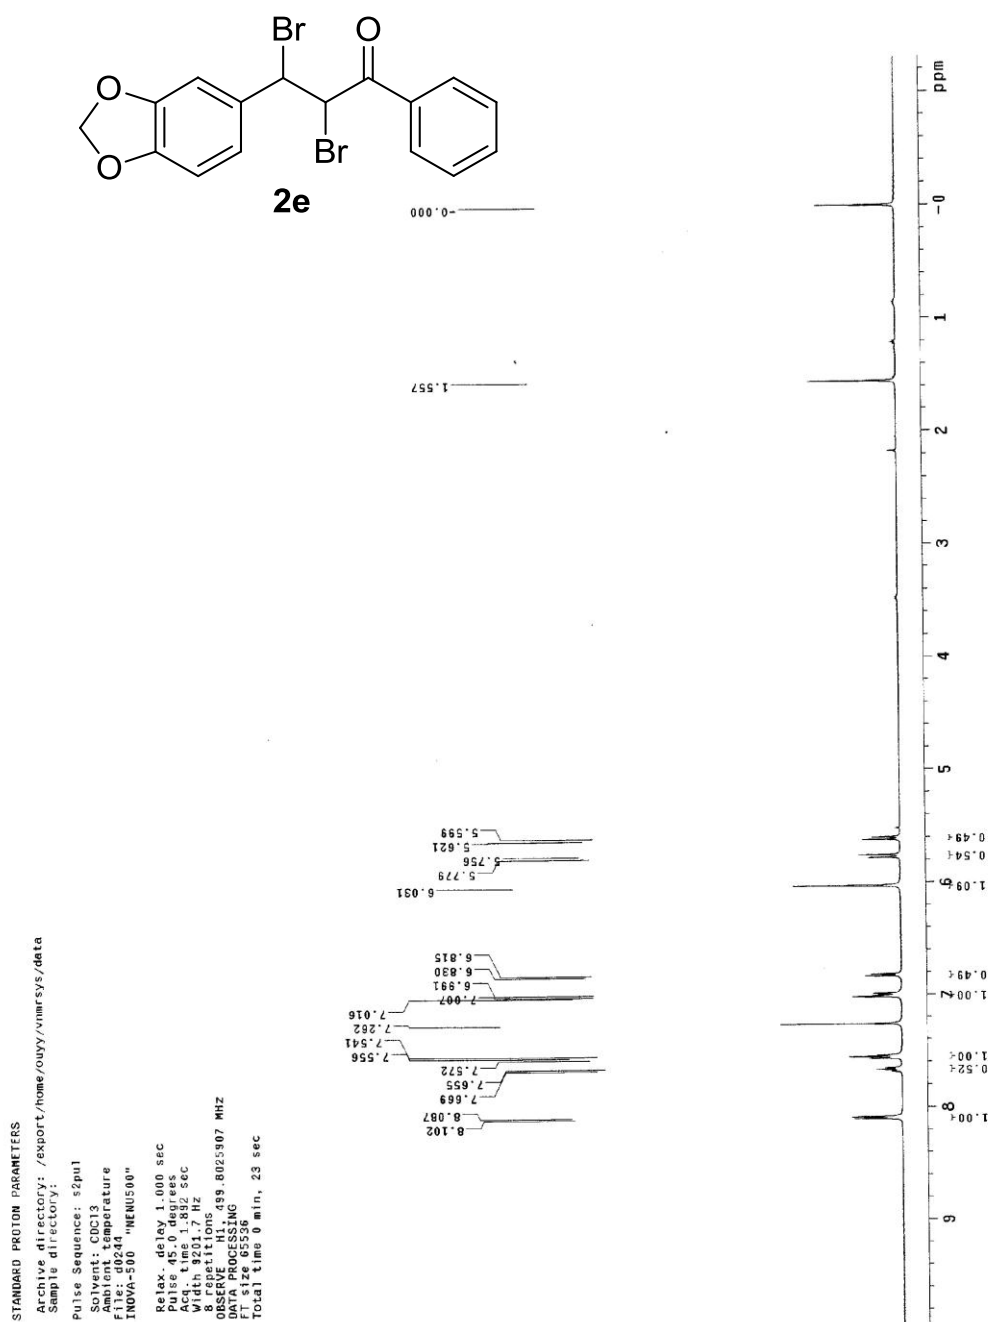

Electronic Supplementary Material (ESI) for RSC Advances  
This journal is © The Royal Society of Chemistry 2012

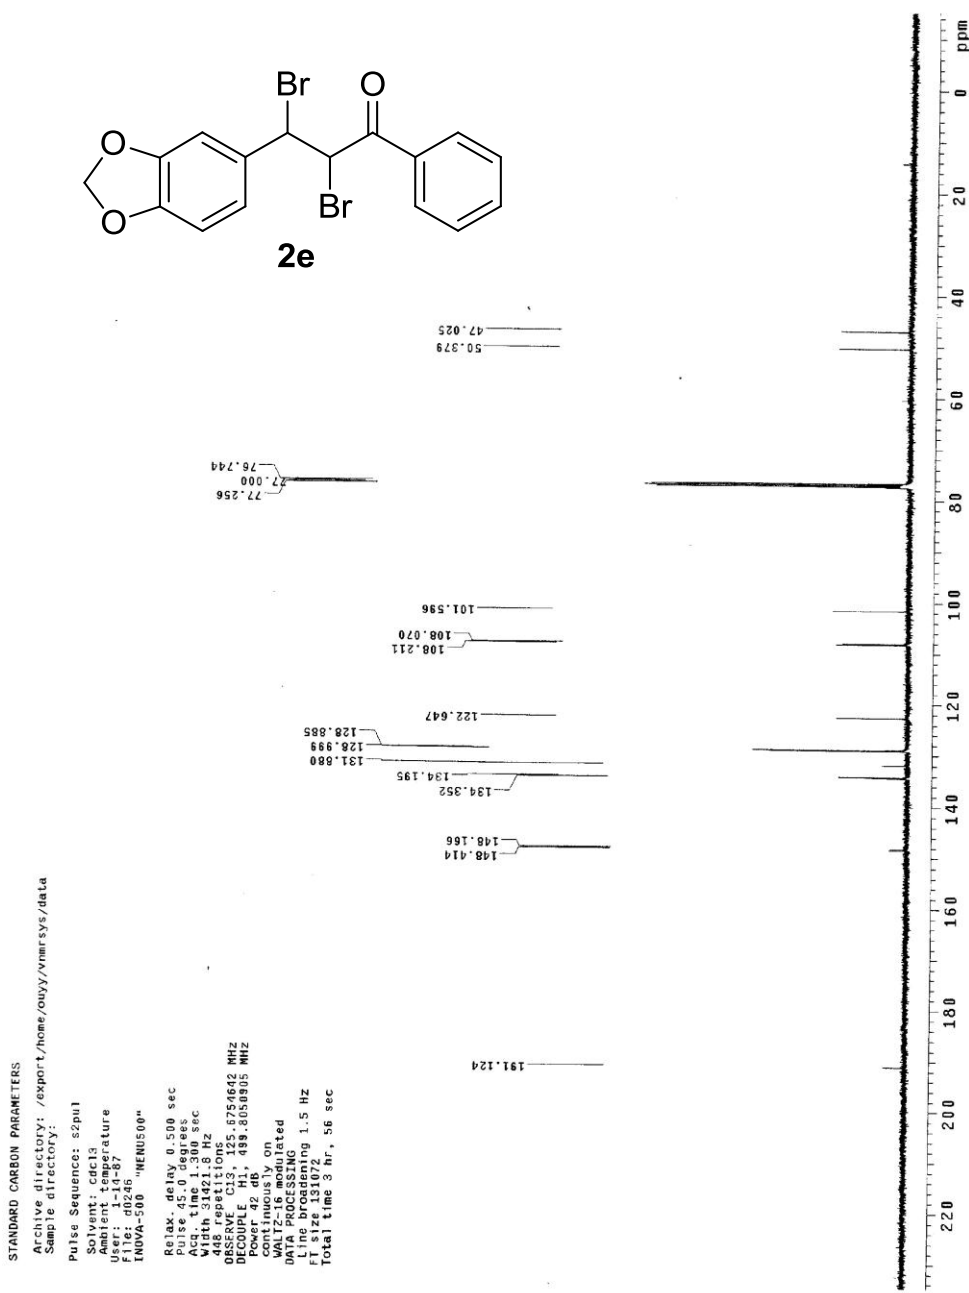



Electronic Supplementary Material (ESI) for RSC Advances  
This journal is © The Royal Society of Chemistry 2012

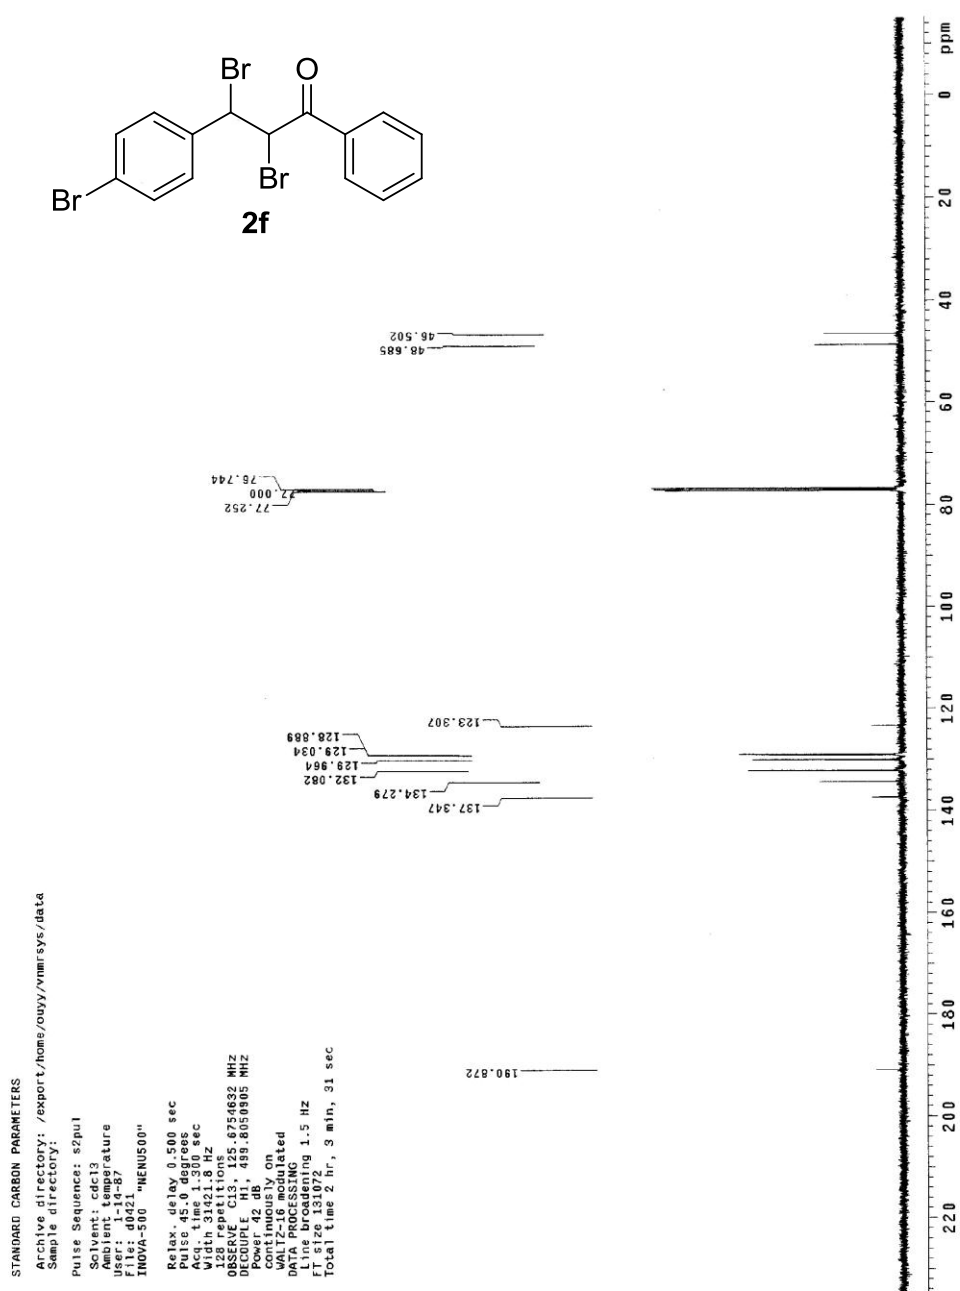

Electronic Supplementary Material (ESI) for RSC Advances  
This journal is © The Royal Society of Chemistry 2012

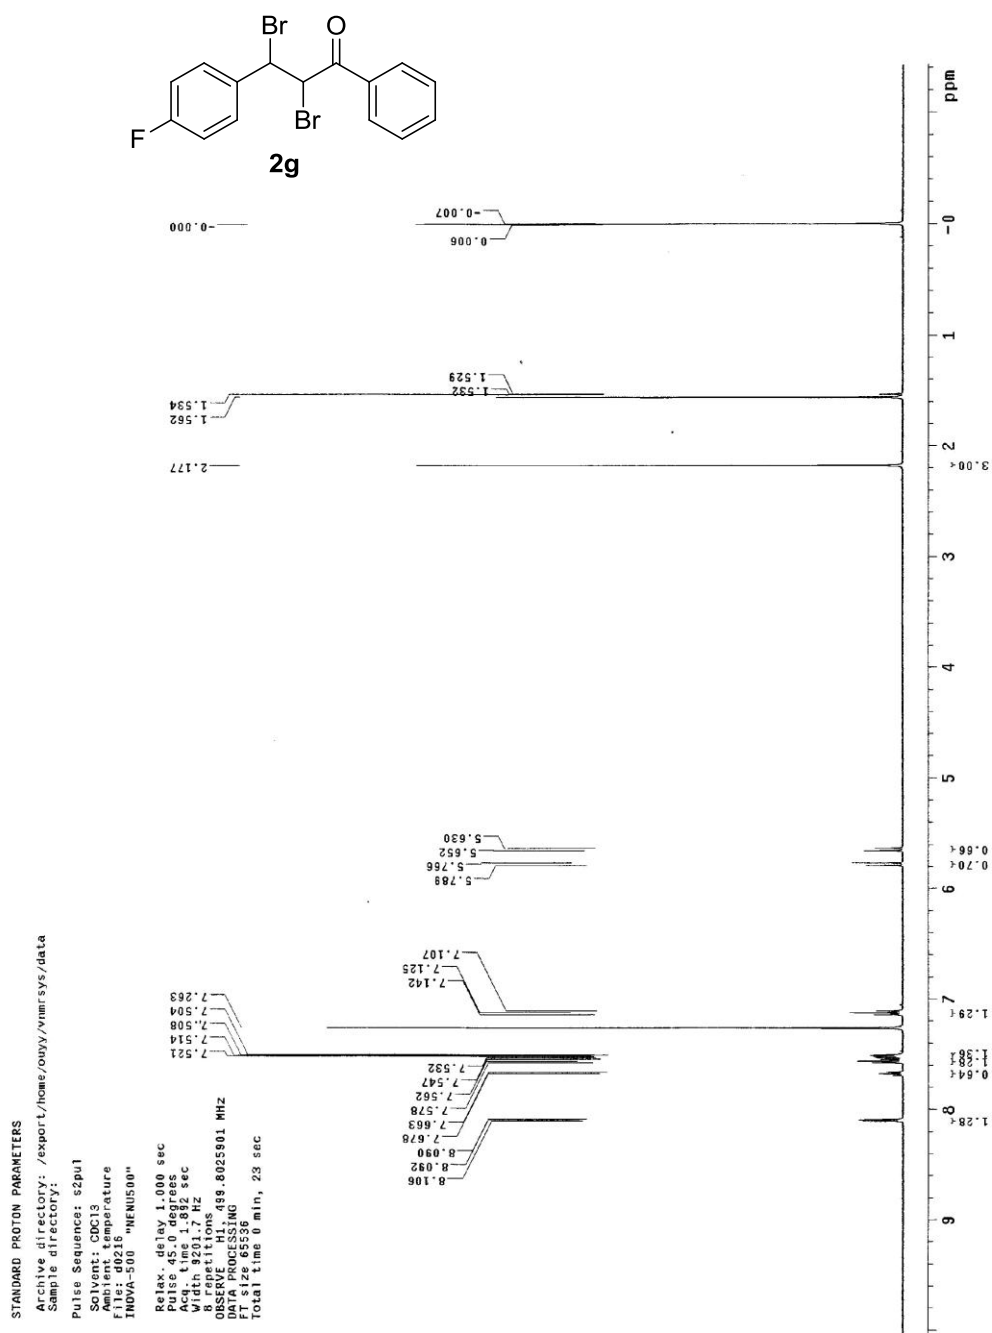

Electronic Supplementary Material (ESI) for RSC Advances  
This journal is © The Royal Society of Chemistry 2012

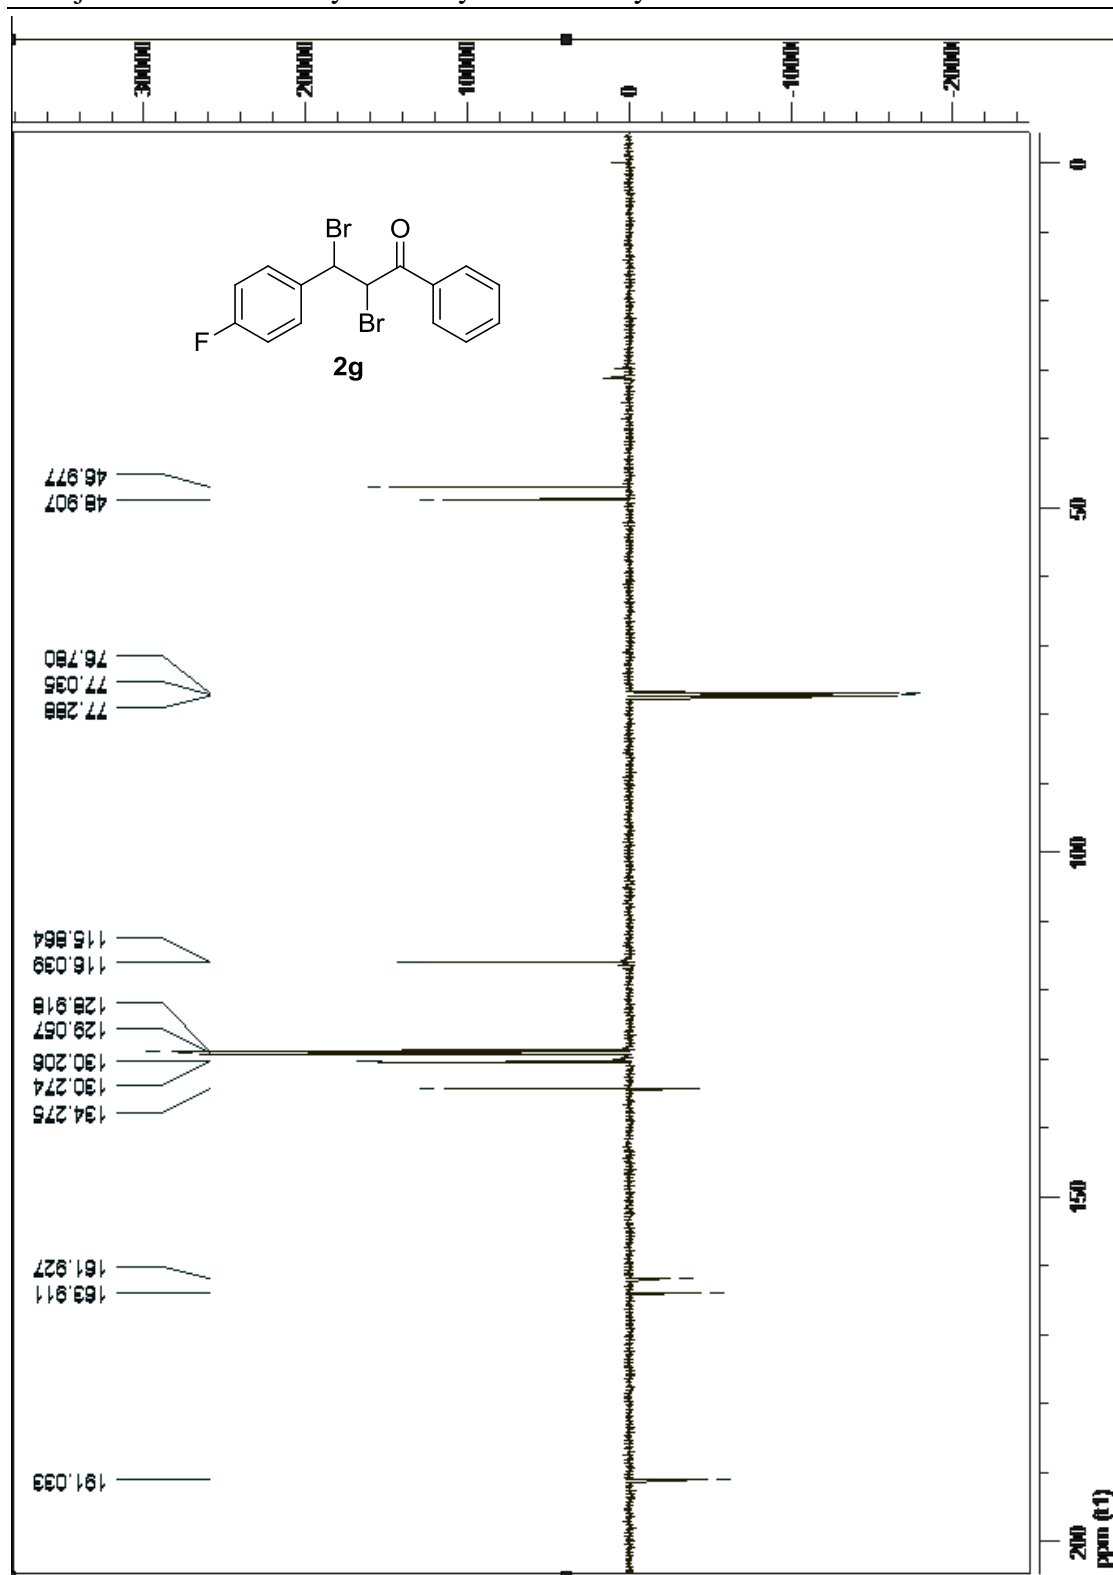

Electronic Supplementary Material (ESI) for RSC Advances  
This journal is © The Royal Society of Chemistry 2012

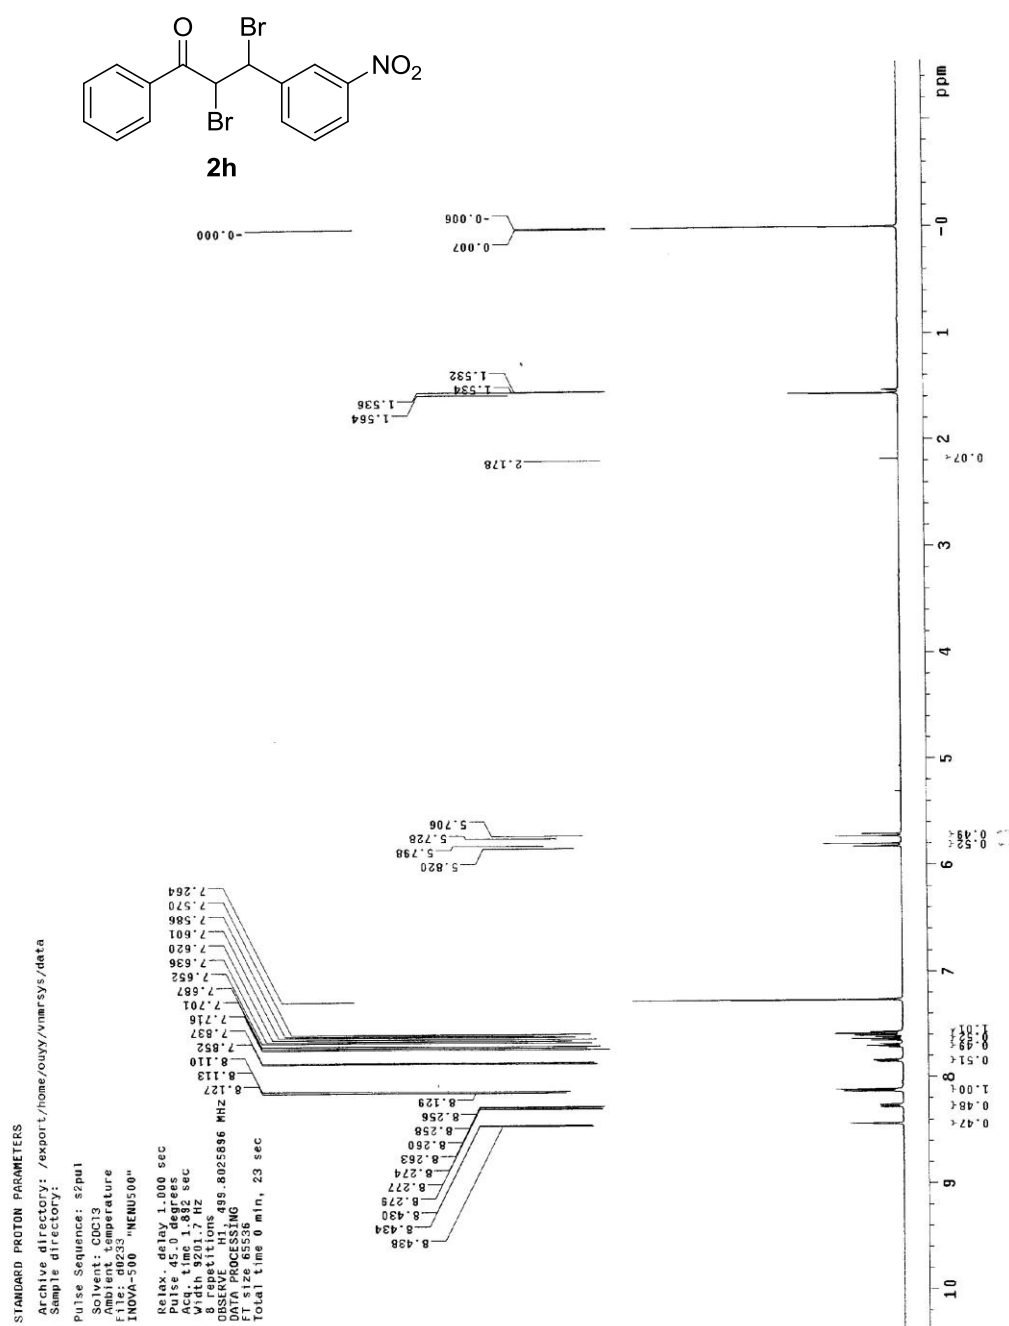

Electronic Supplementary Material (ESI) for RSC Advances  
This journal is © The Royal Society of Chemistry 2012

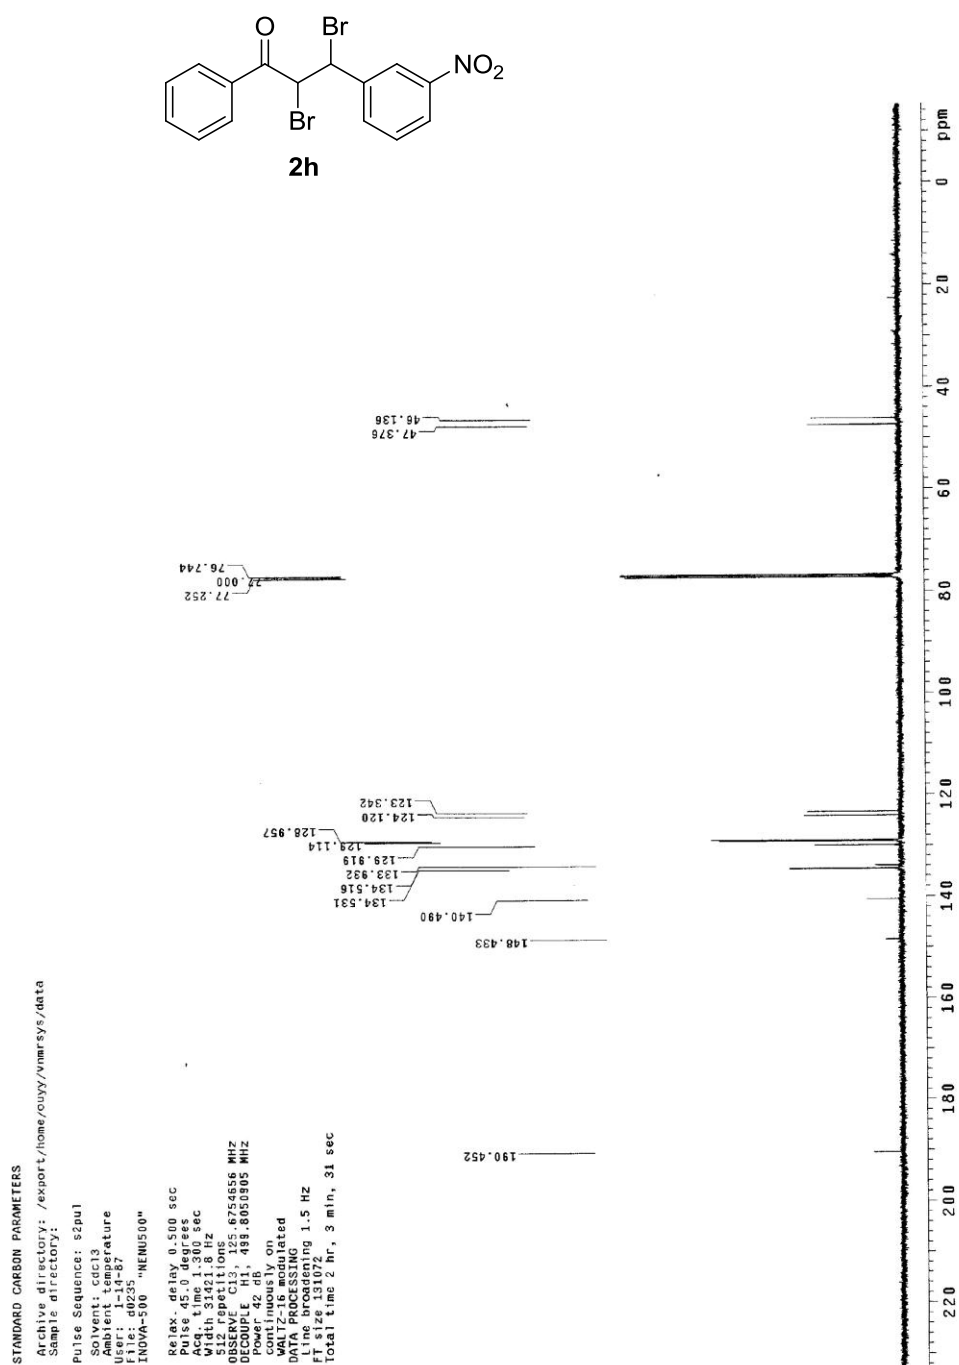

Electronic Supplementary Material (ESI) for RSC Advances  
This journal is © The Royal Society of Chemistry 2012

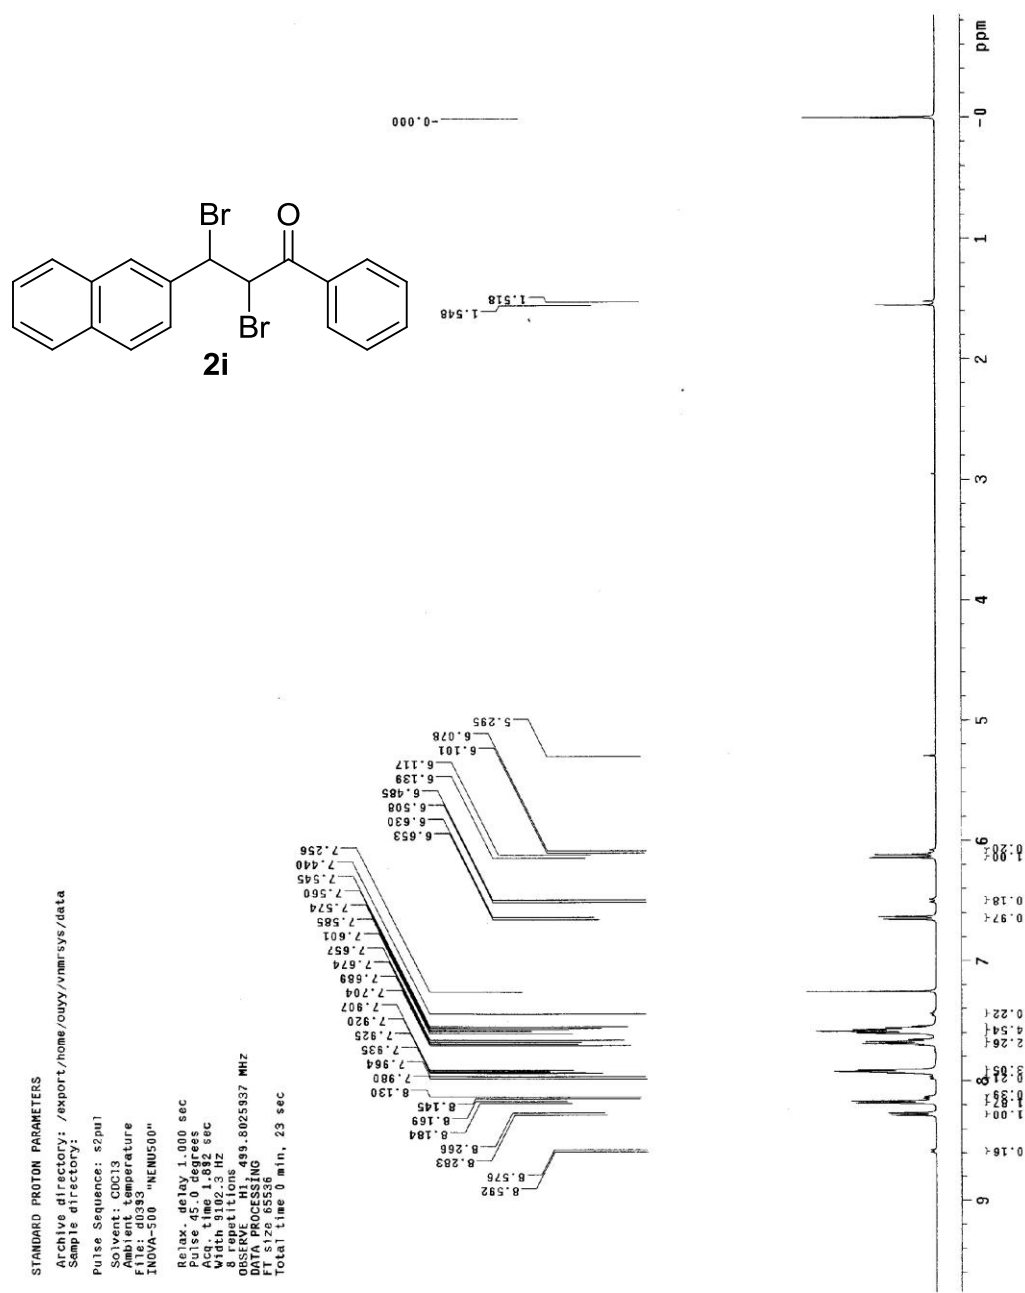

Electronic Supplementary Material (ESI) for RSC Advances  
This journal is © The Royal Society of Chemistry 2012

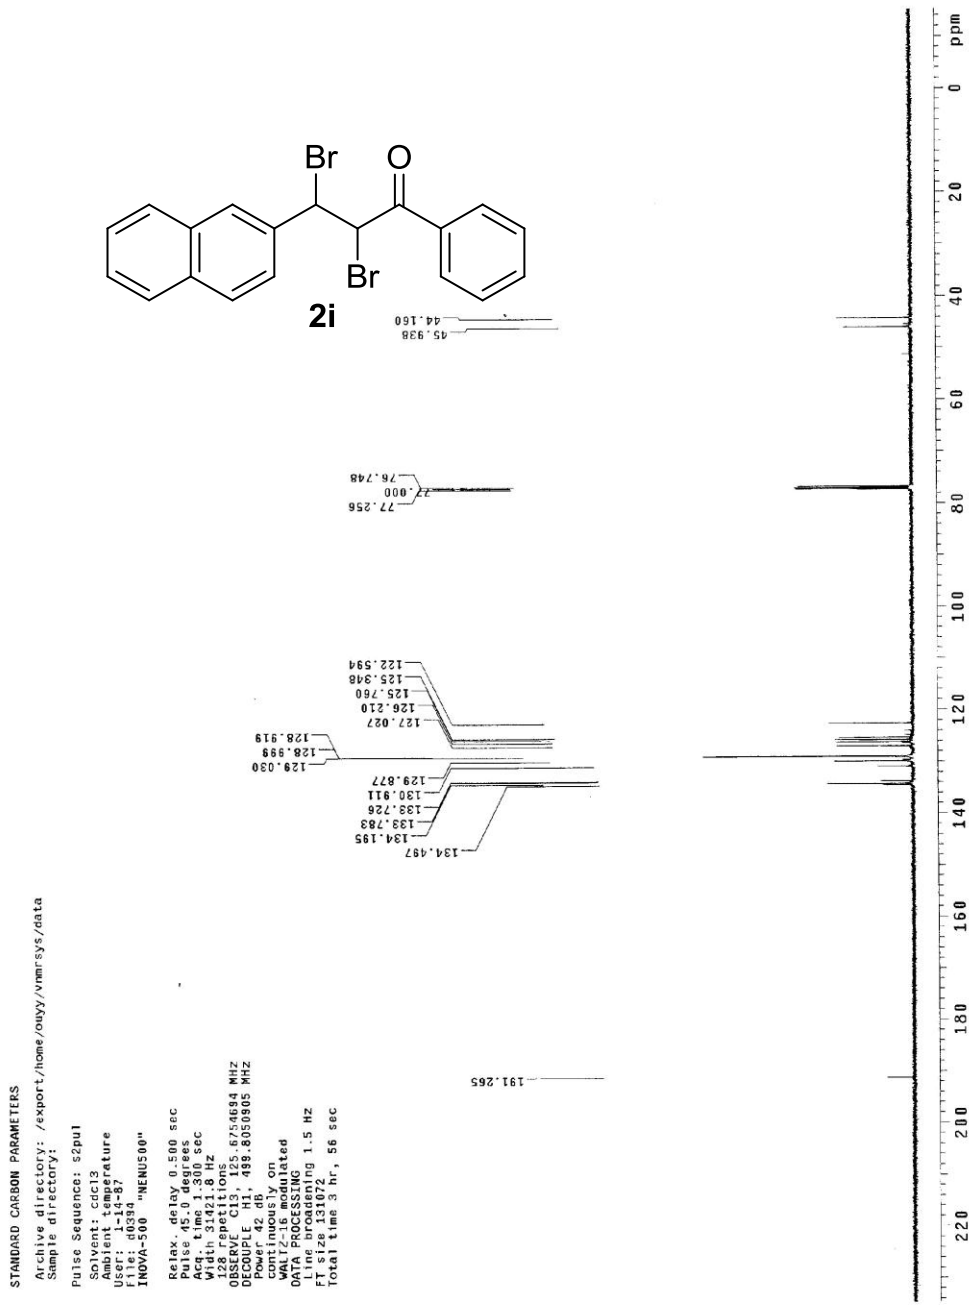



Electronic Supplementary Material (ESI) for RSC Advances  
This journal is © The Royal Society of Chemistry 2012

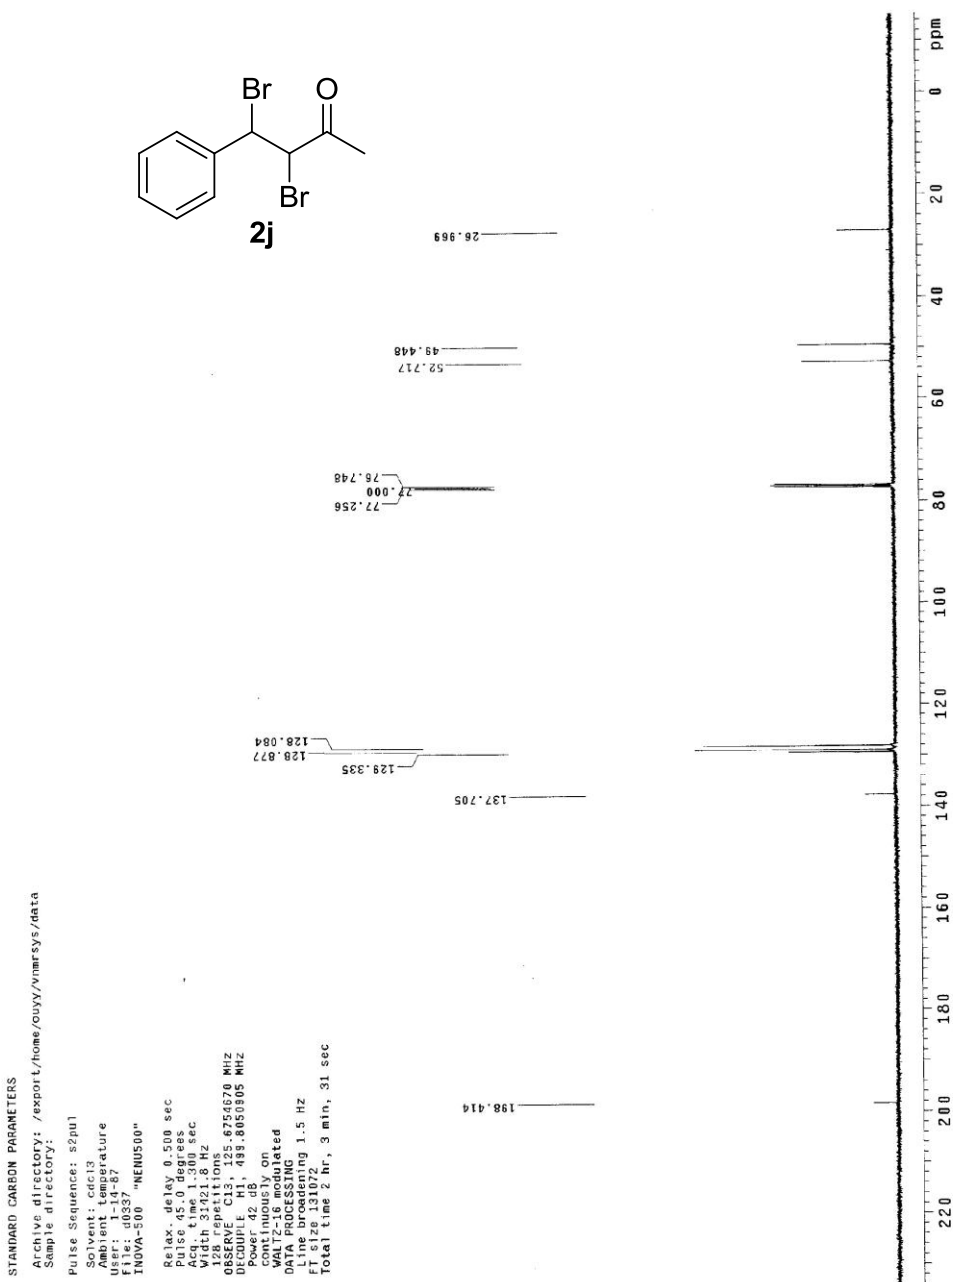

Electronic Supplementary Material (ESI) for RSC Advances  
This journal is © The Royal Society of Chemistry 2012

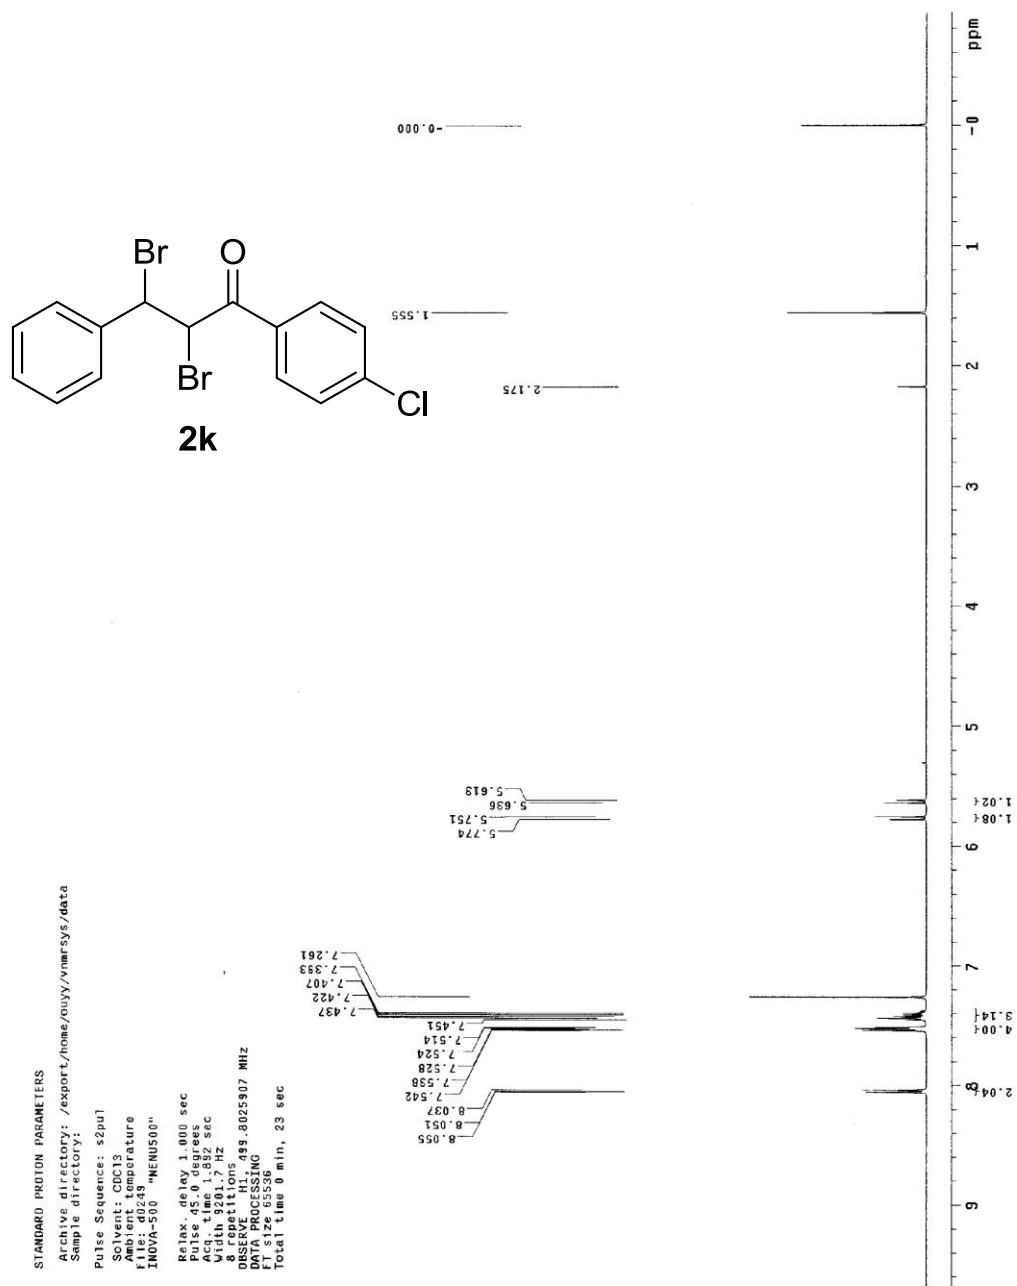

Electronic Supplementary Material (ESI) for RSC Advances  
This journal is © The Royal Society of Chemistry 2012

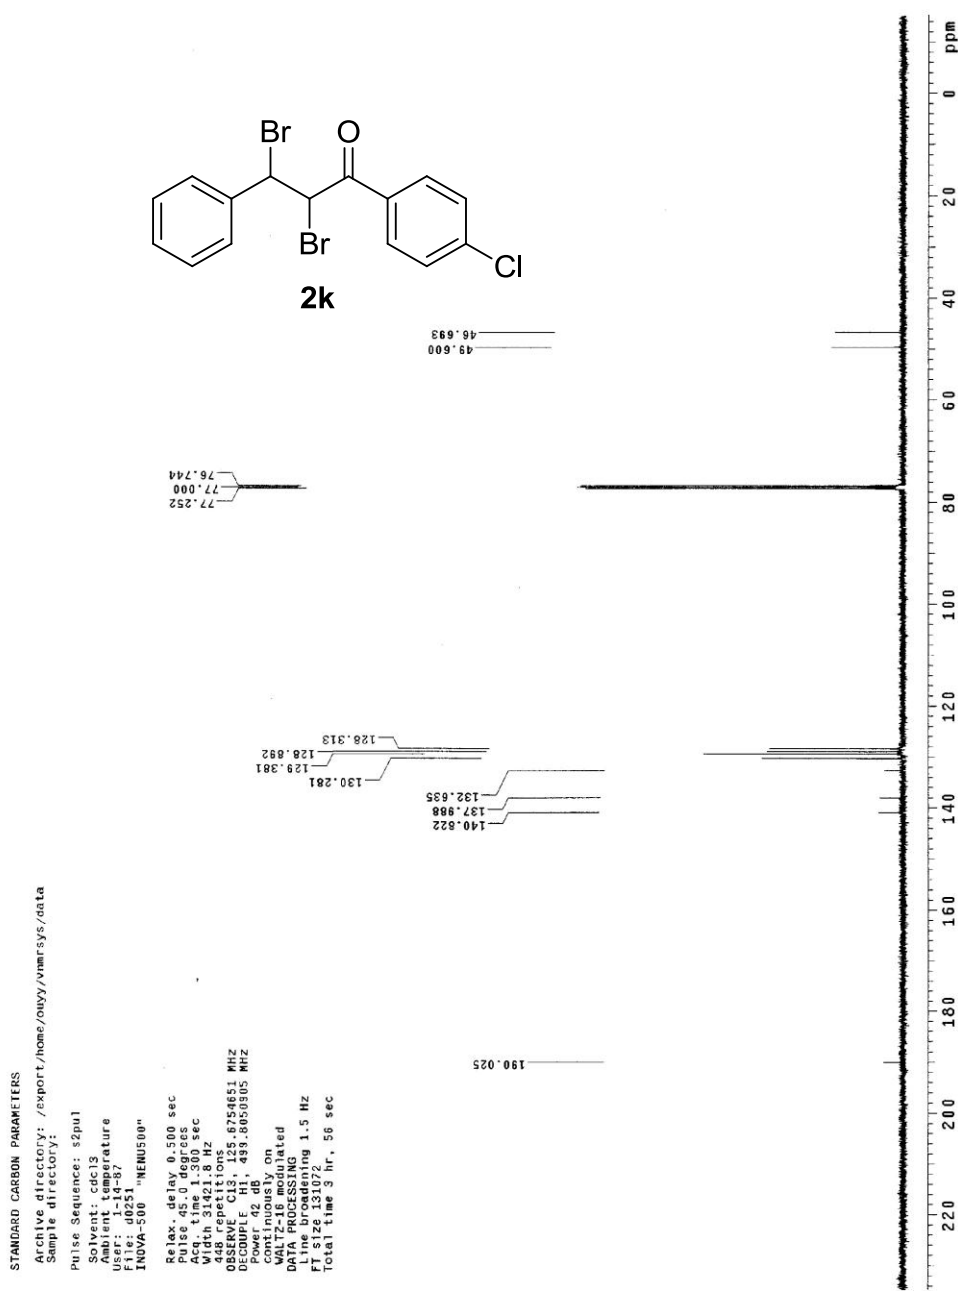



Electronic Supplementary Material (ESI) for RSC Advances  
This journal is © The Royal Society of Chemistry 2012

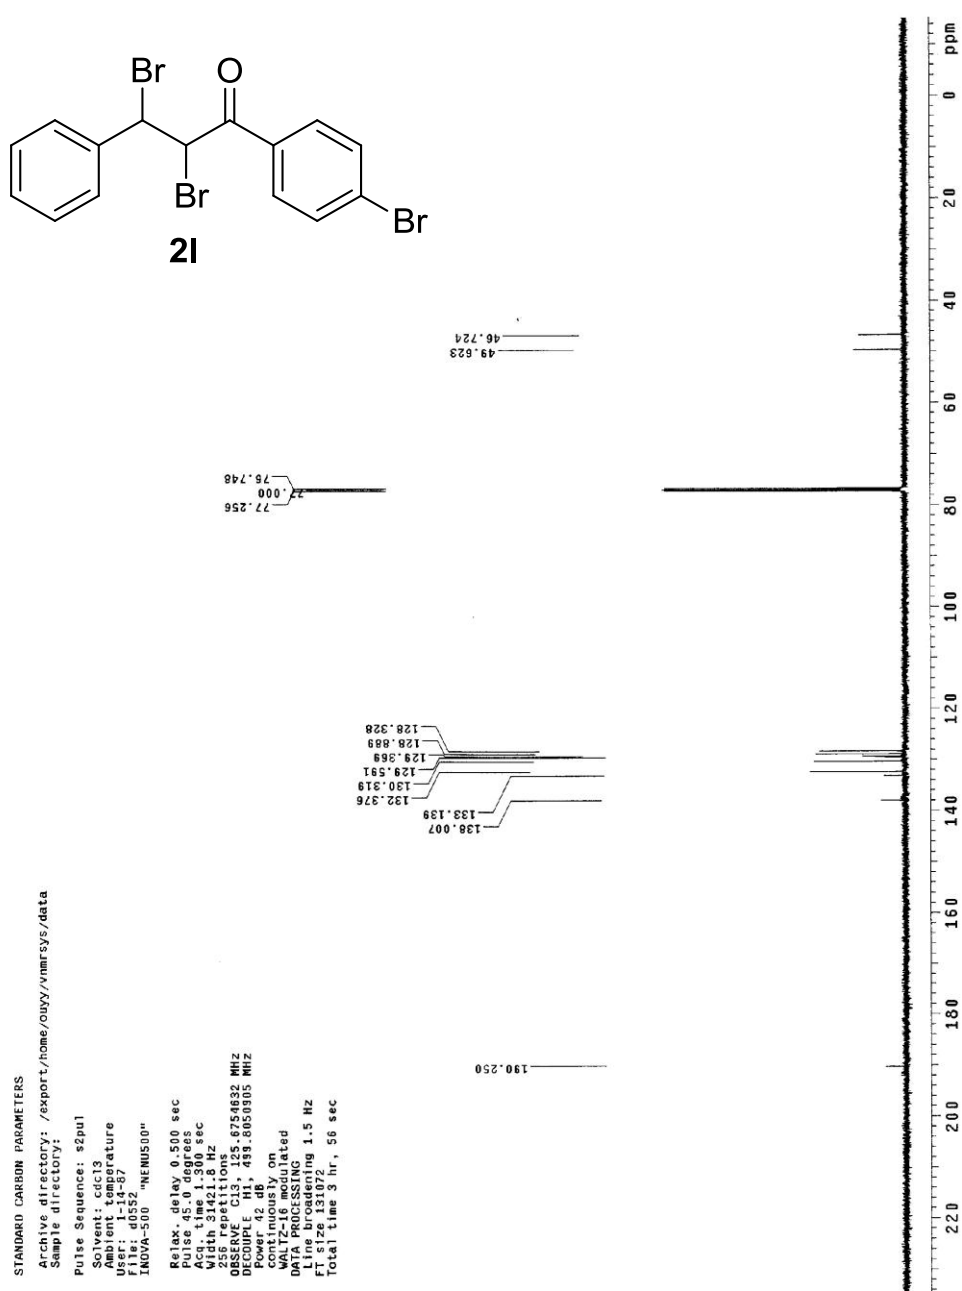

Electronic Supplementary Material (ESI) for RSC Advances  
This journal is © The Royal Society of Chemistry 2012

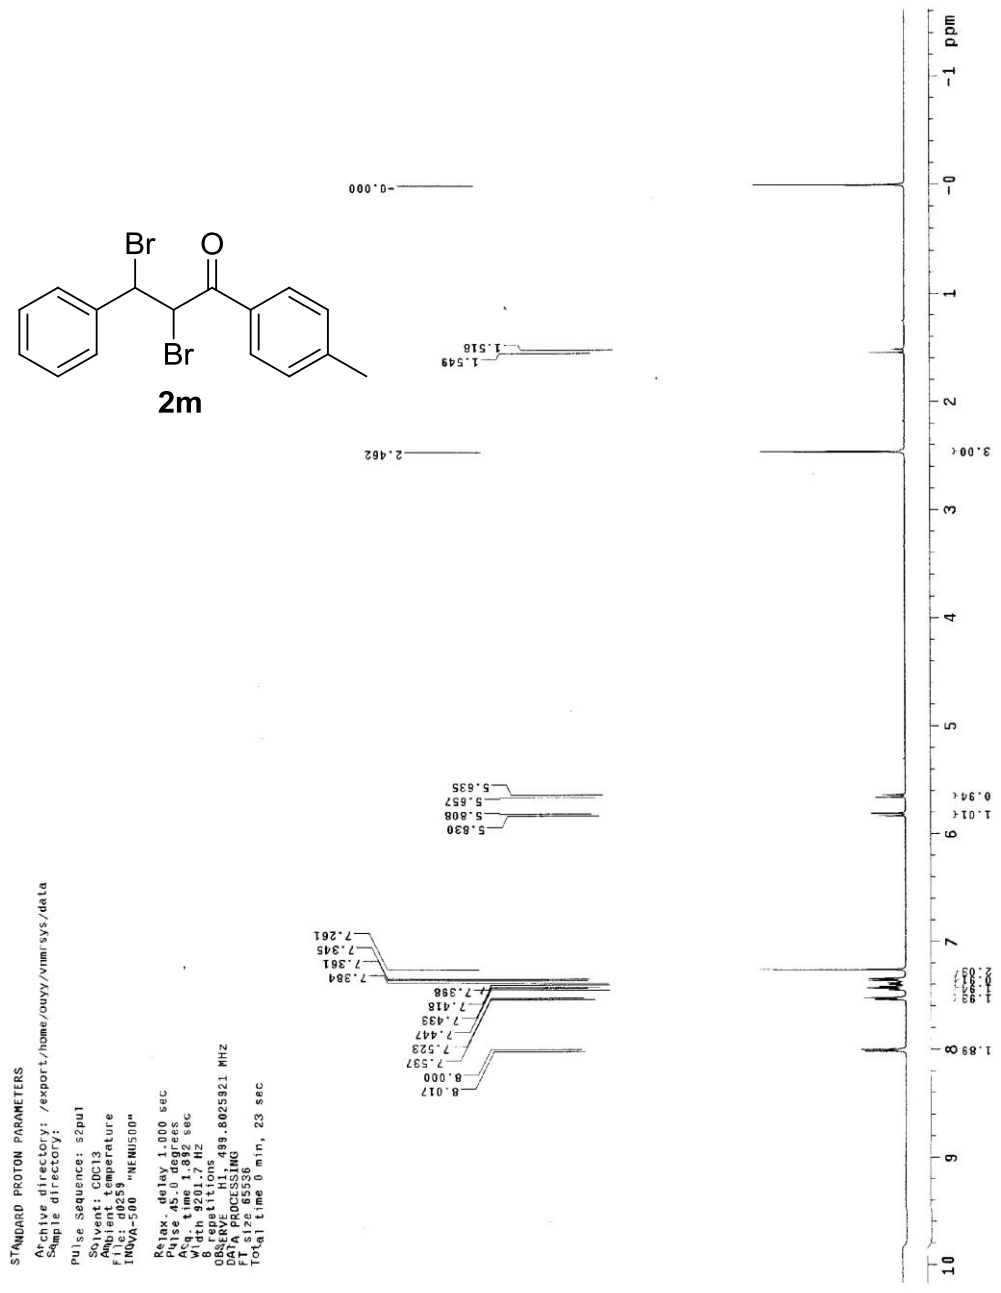

Electronic Supplementary Material (ESI) for RSC Advances  
This journal is © The Royal Society of Chemistry 2012

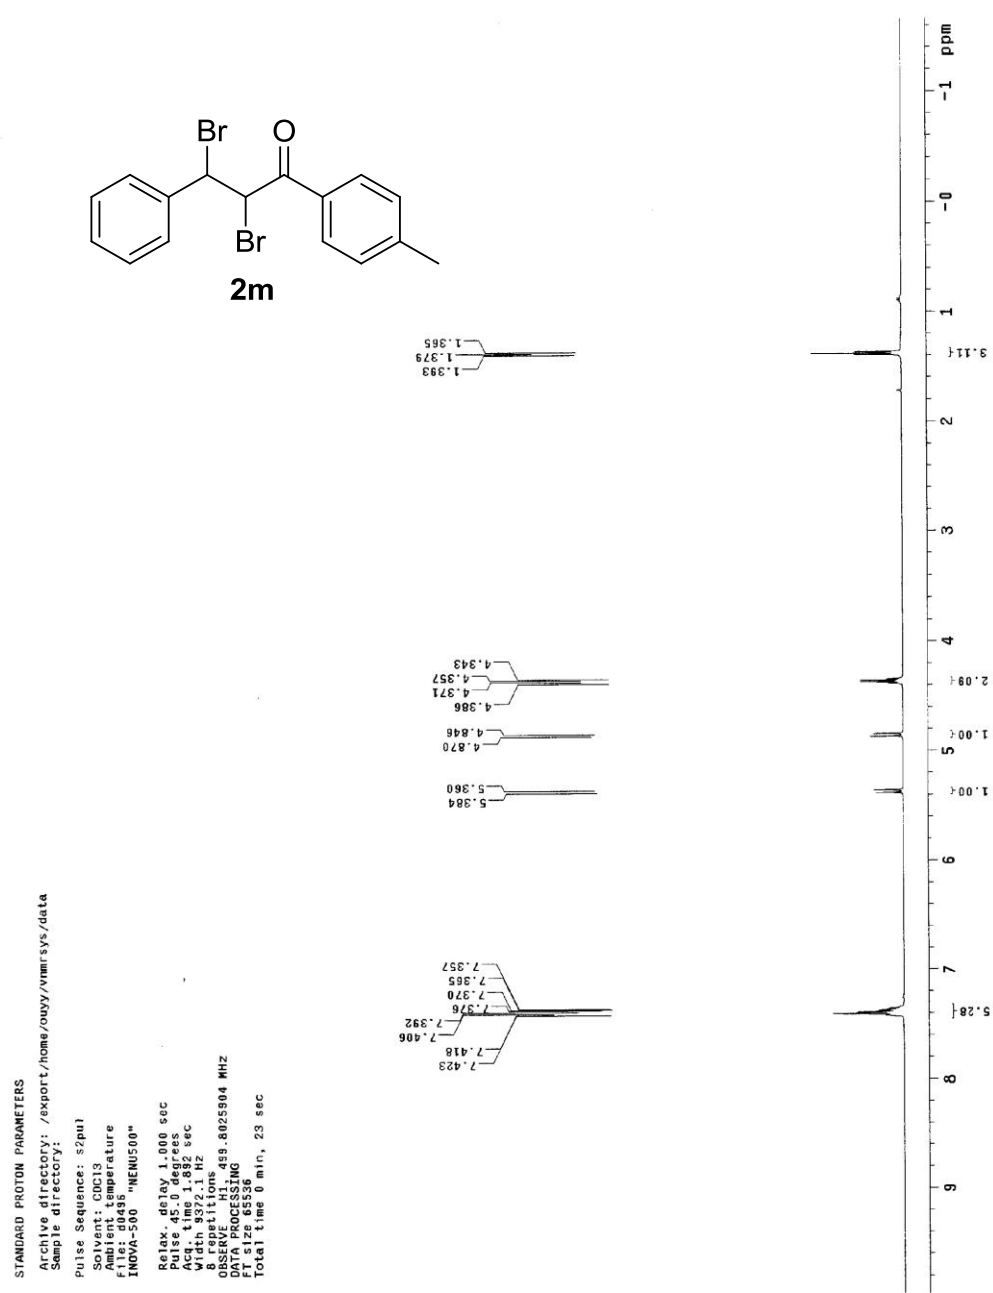

Electronic Supplementary Material (ESI) for RSC Advances  
This journal is © The Royal Society of Chemistry 2012

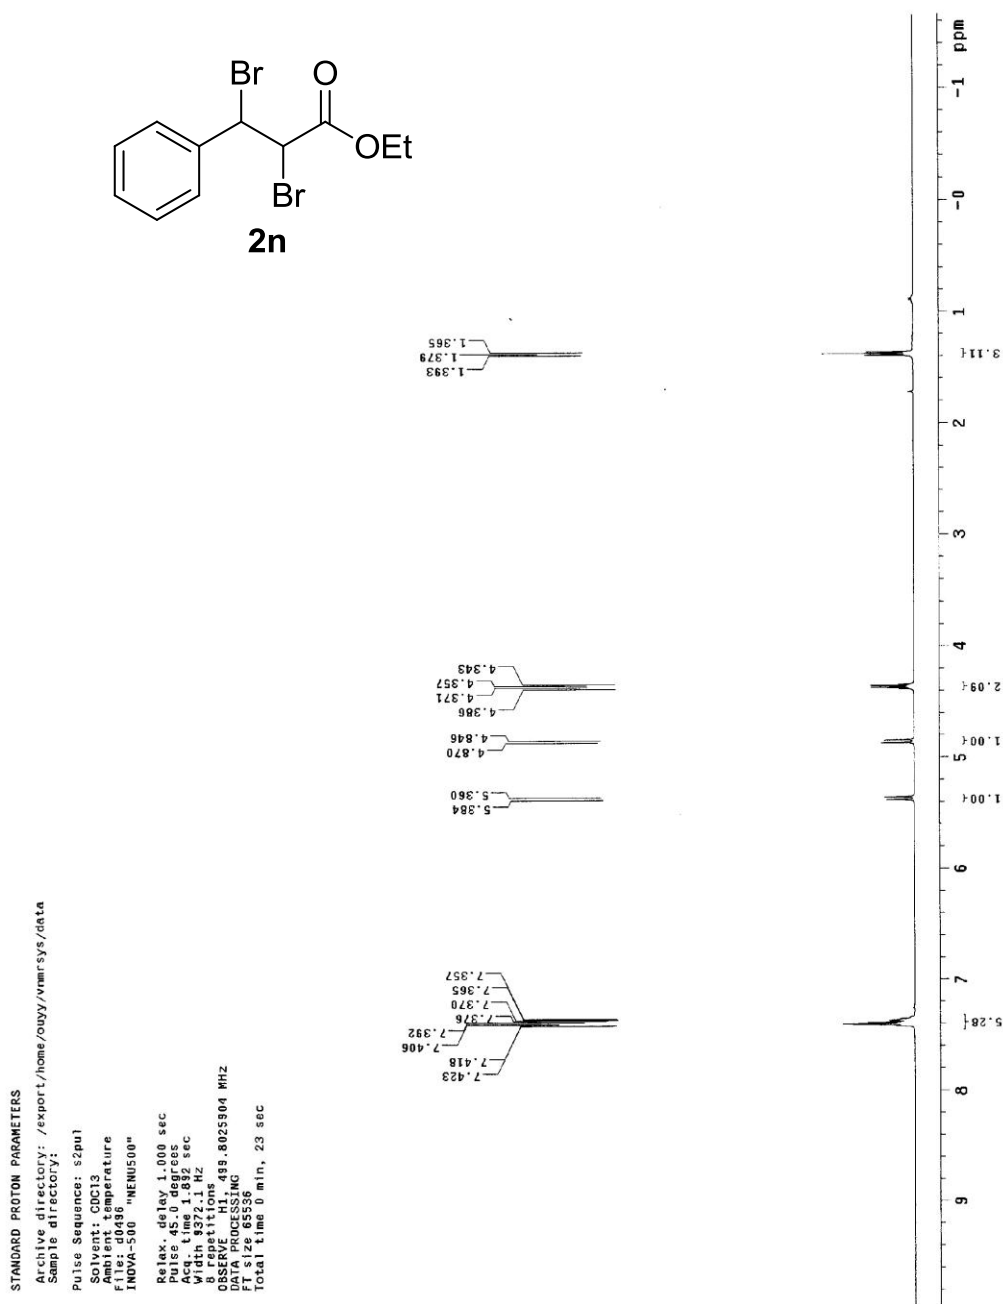

Electronic Supplementary Material (ESI) for RSC Advances  
This journal is © The Royal Society of Chemistry 2012

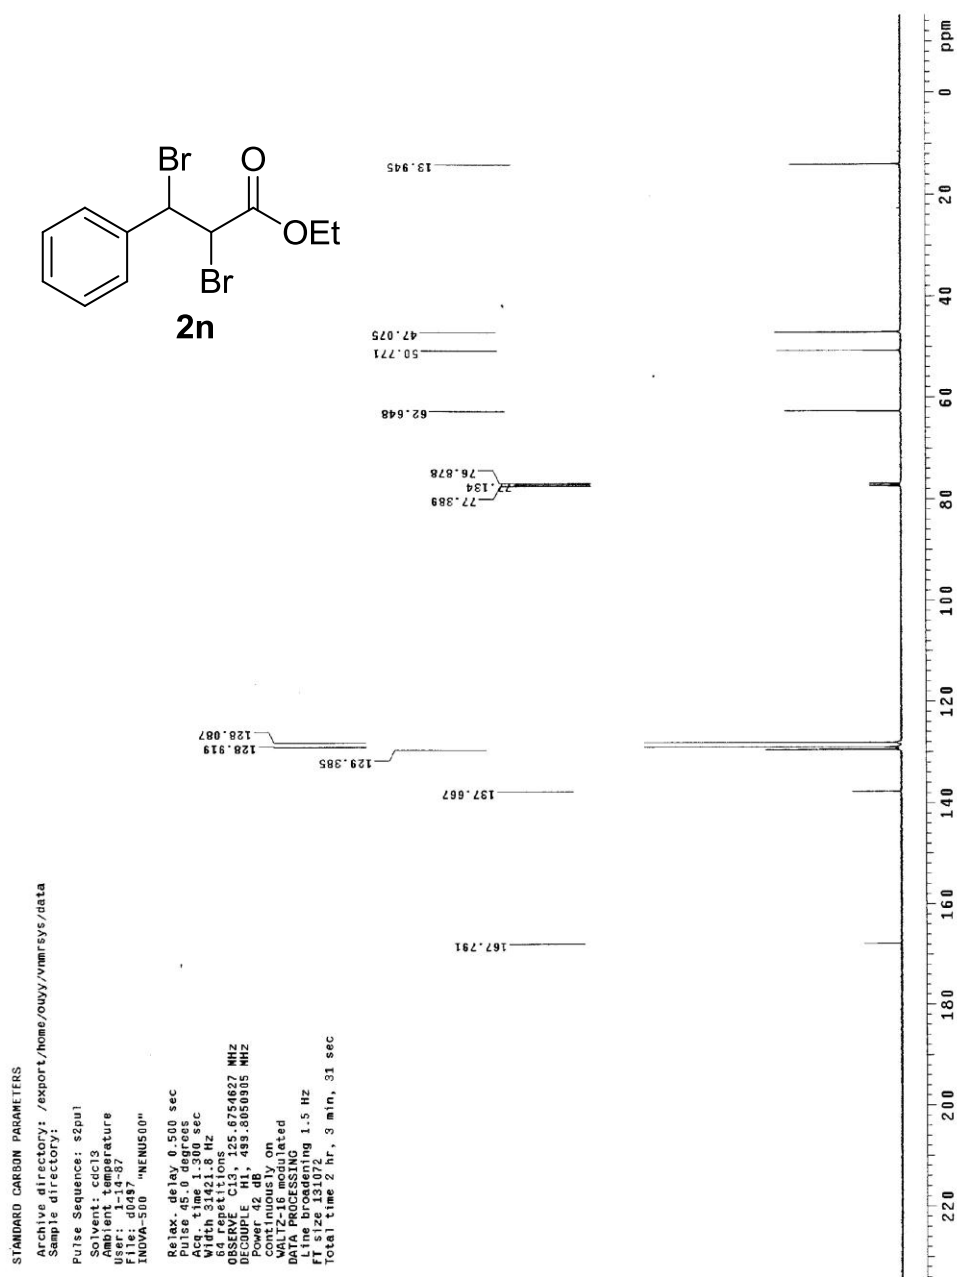

Electronic Supplementary Material (ESI) for RSC Advances  
This journal is © The Royal Society of Chemistry 2012

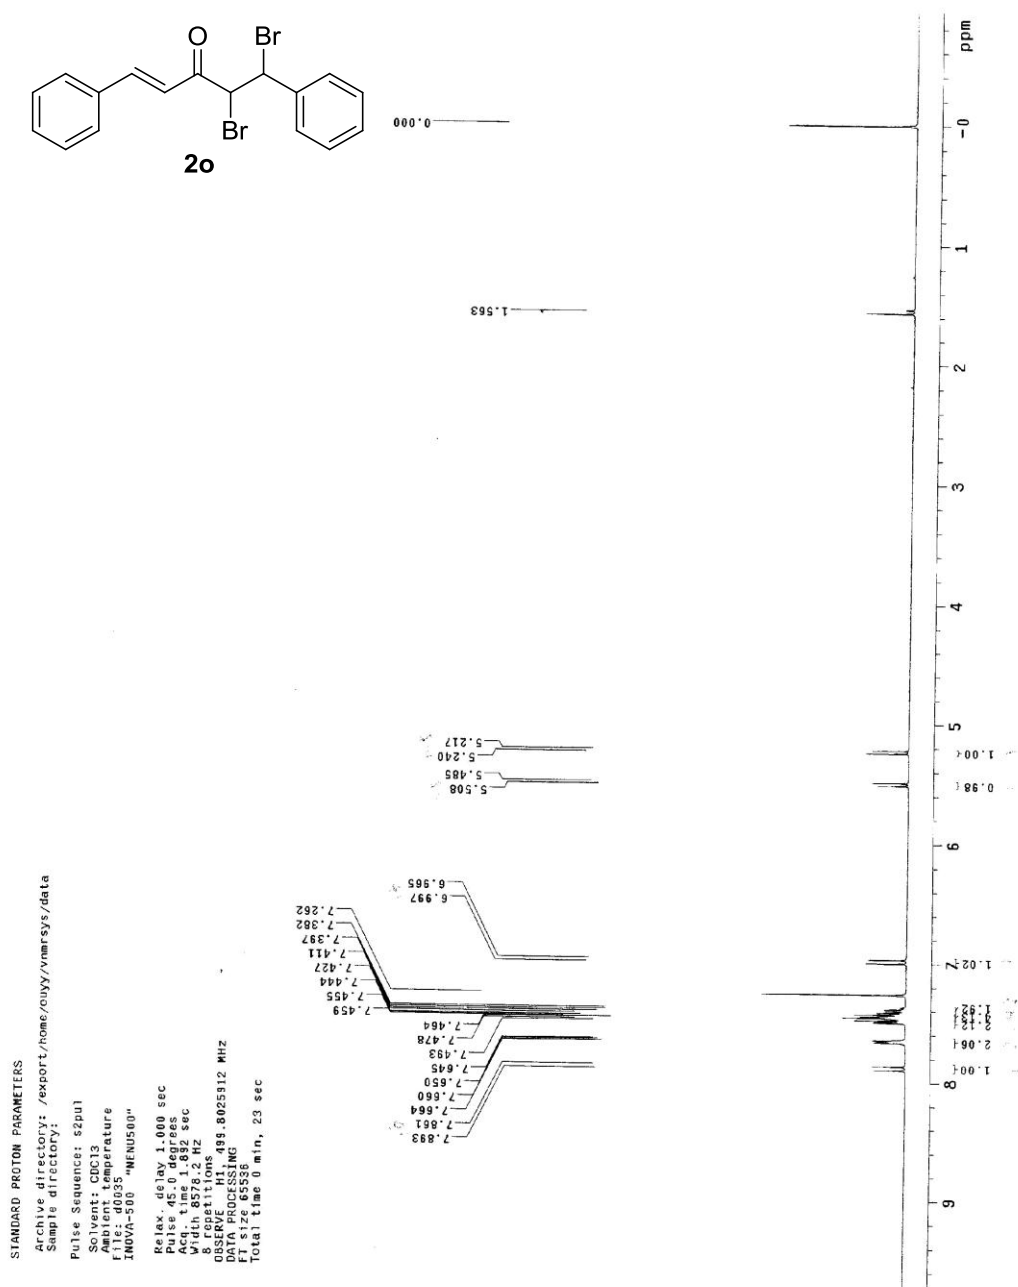

Electronic Supplementary Material (ESI) for RSC Advances  
This journal is © The Royal Society of Chemistry 2012

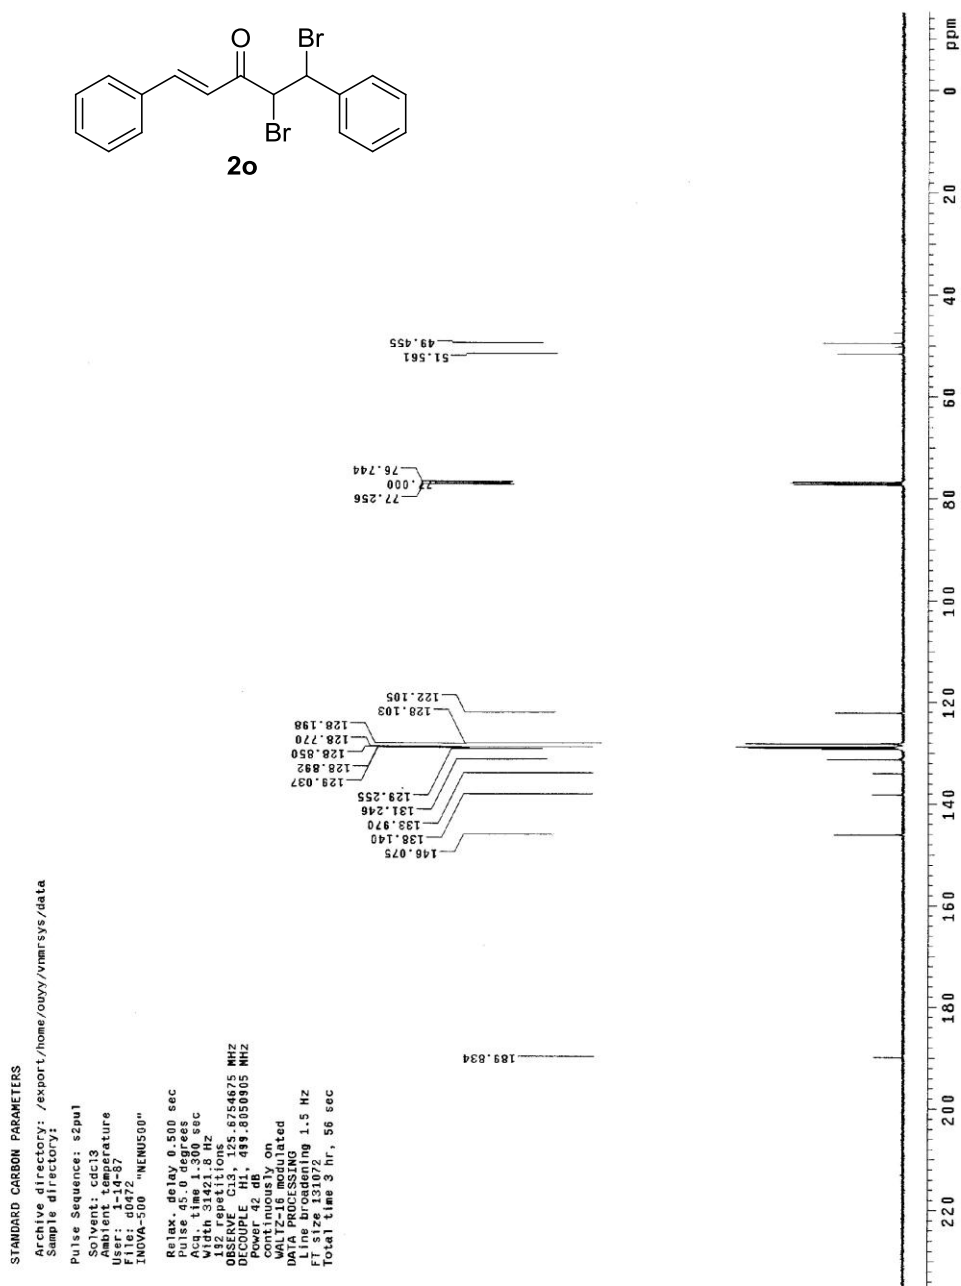



Electronic Supplementary Material (ESI) for RSC Advances  
This journal is © The Royal Society of Chemistry 2012

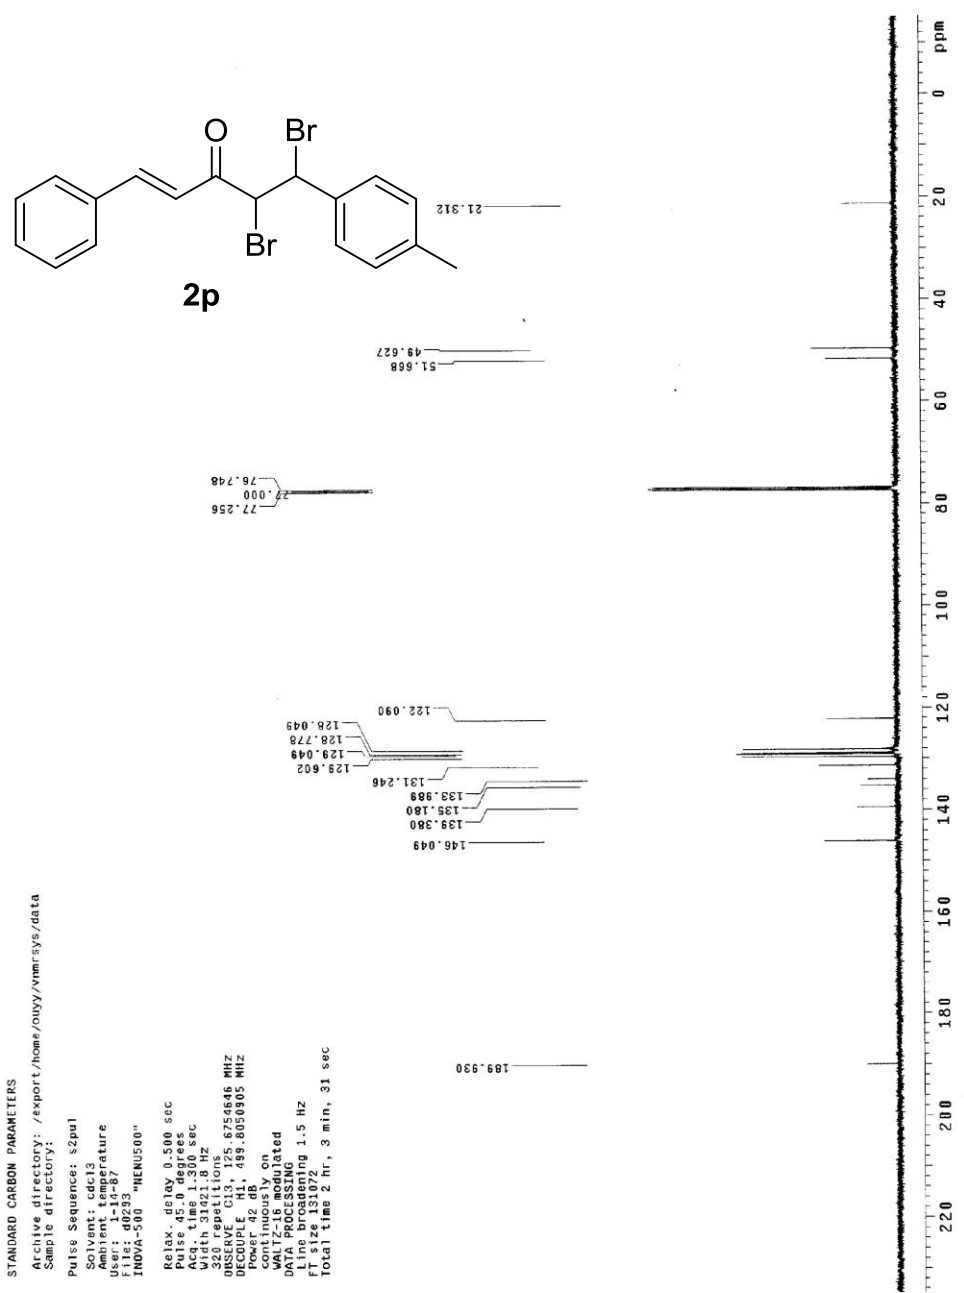

Electronic Supplementary Material (ESI) for RSC Advances  
This journal is © The Royal Society of Chemistry 2012

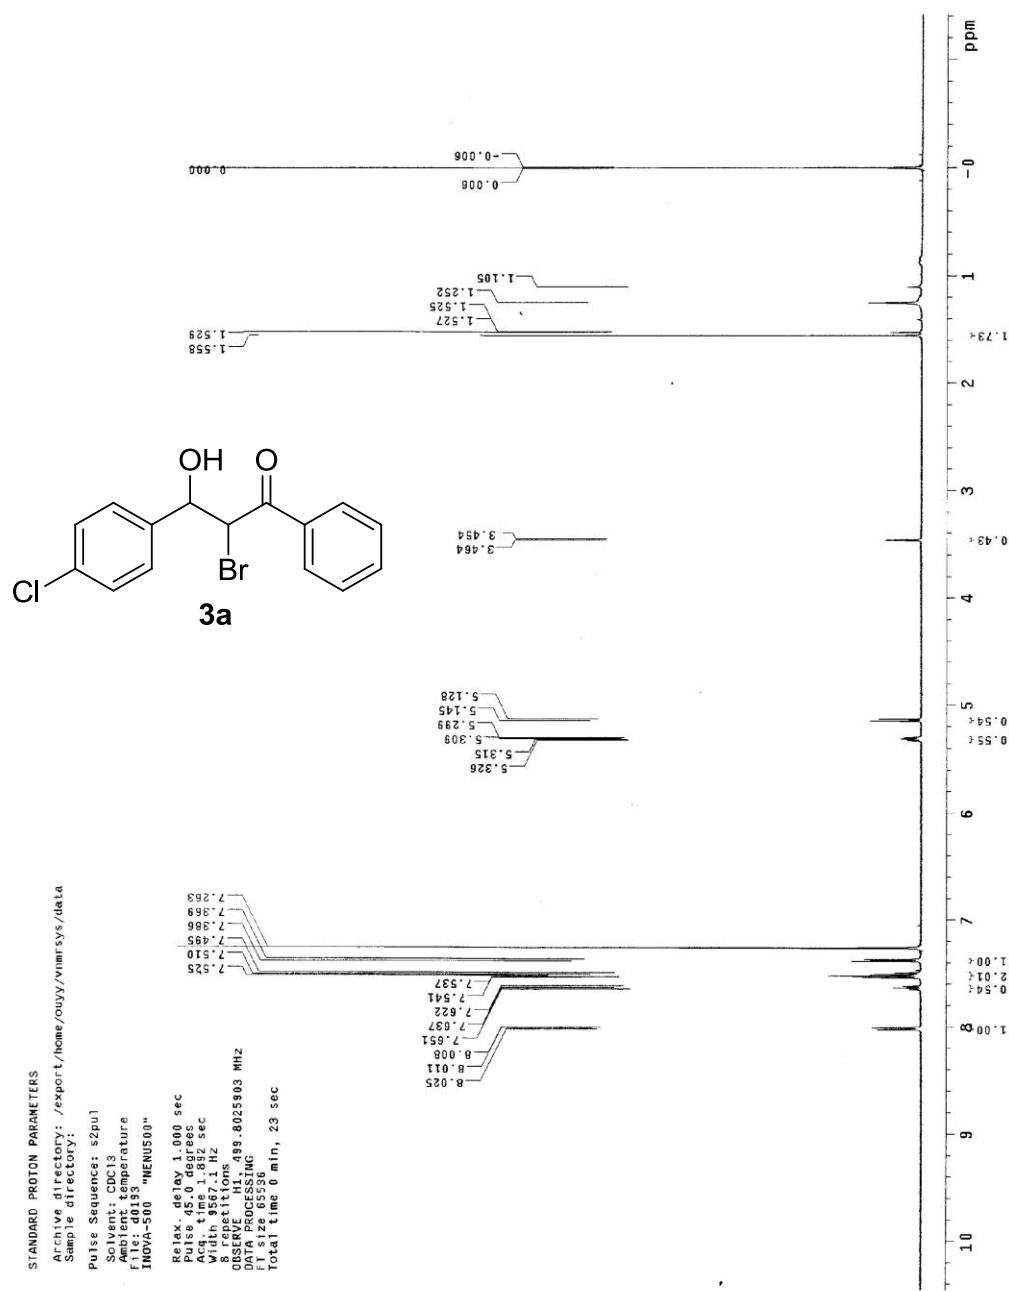

Electronic Supplementary Material (ESI) for RSC Advances  
This journal is © The Royal Society of Chemistry 2012

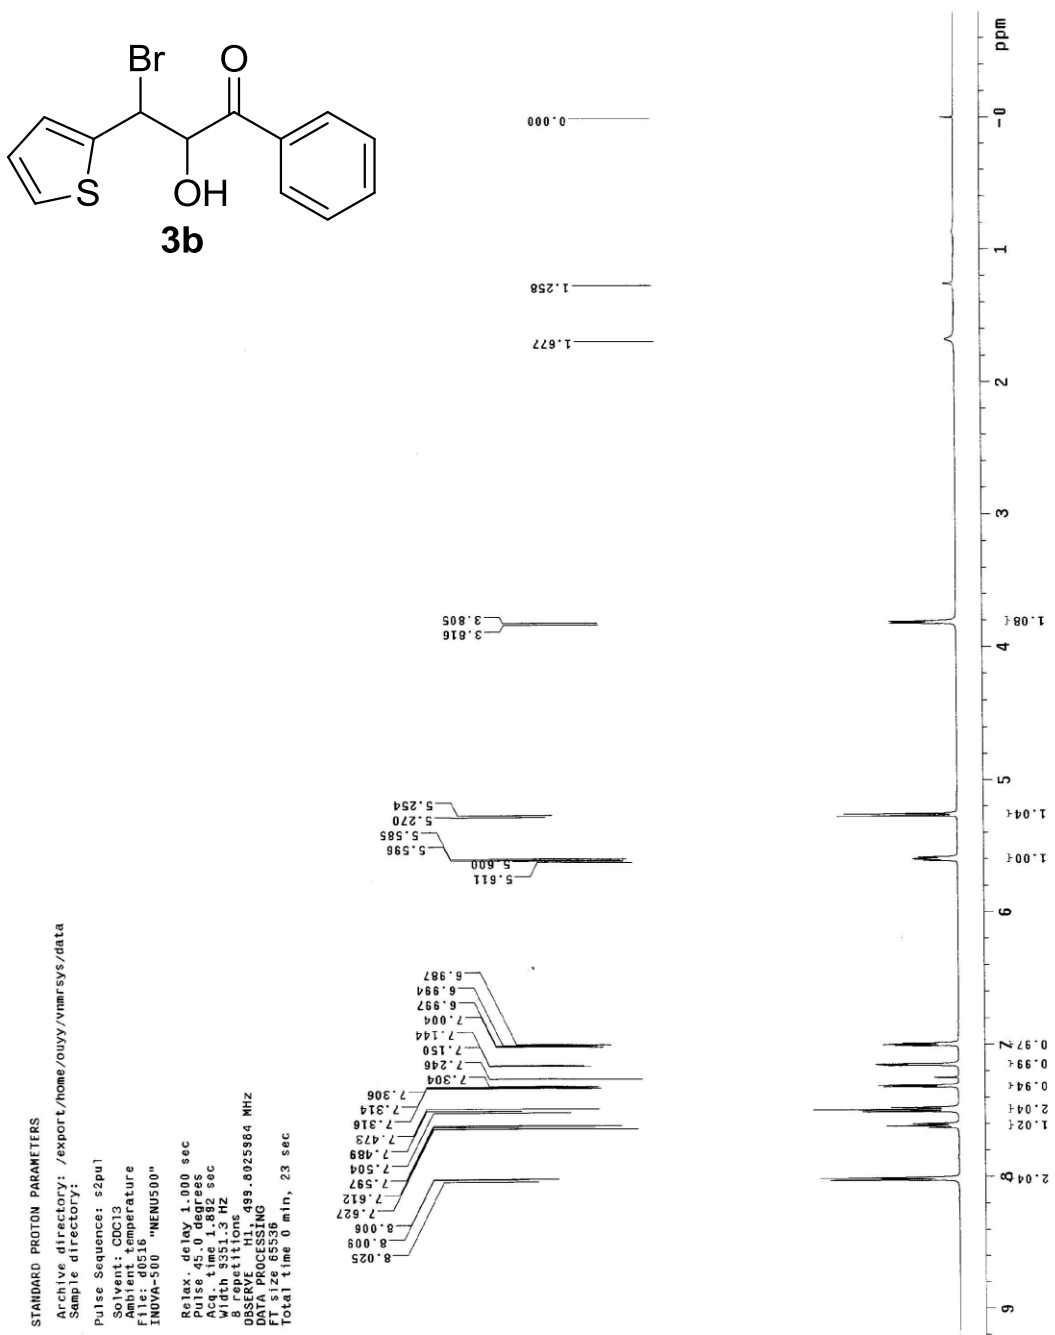

Electronic Supplementary Material (ESI) for RSC Advances  
This journal is © The Royal Society of Chemistry 2012

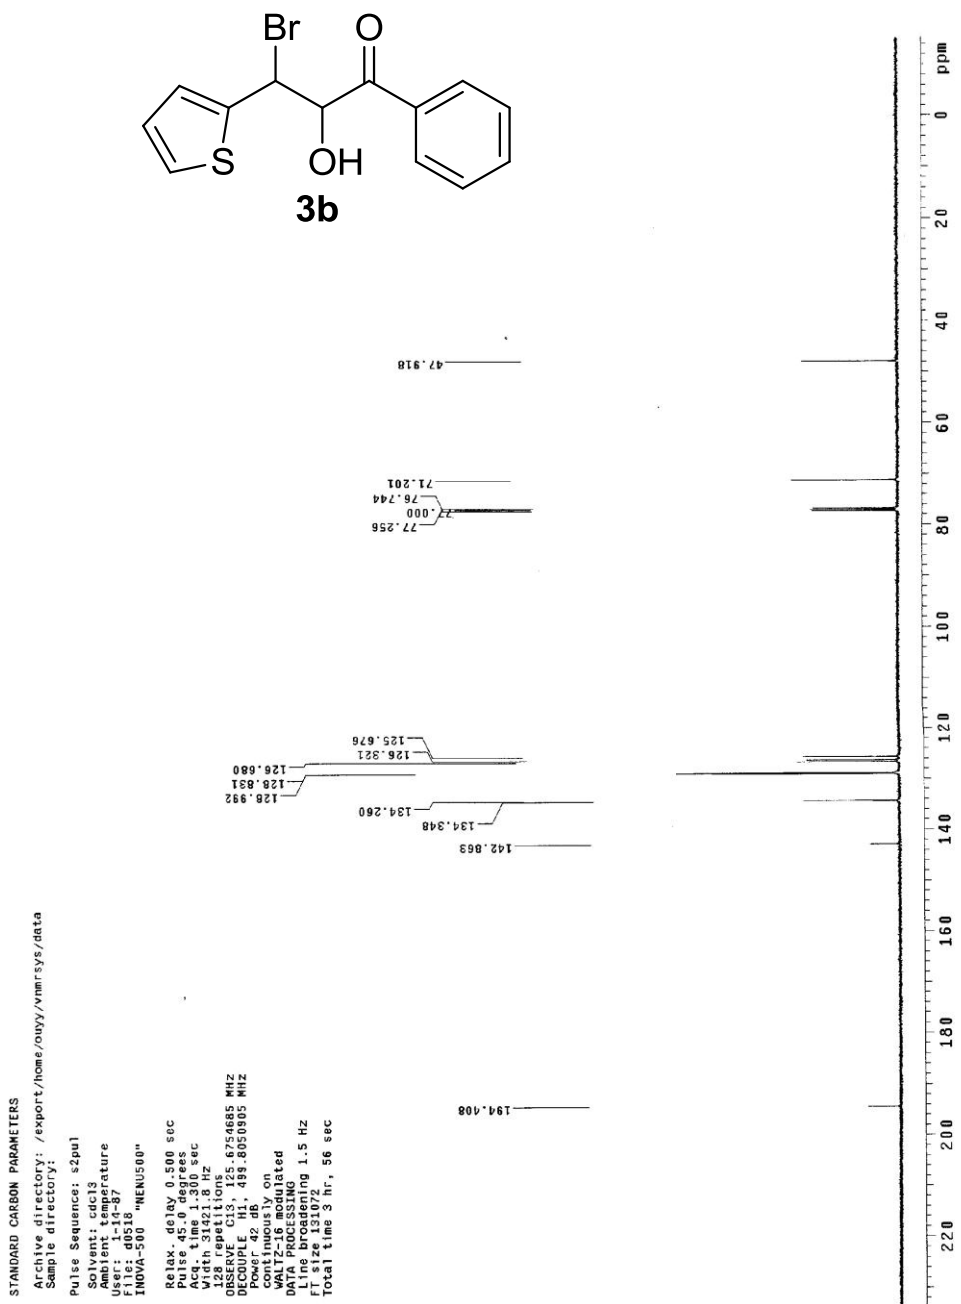

Electronic Supplementary Material (ESI) for RSC Advances  
This journal is © The Royal Society of Chemistry 2012

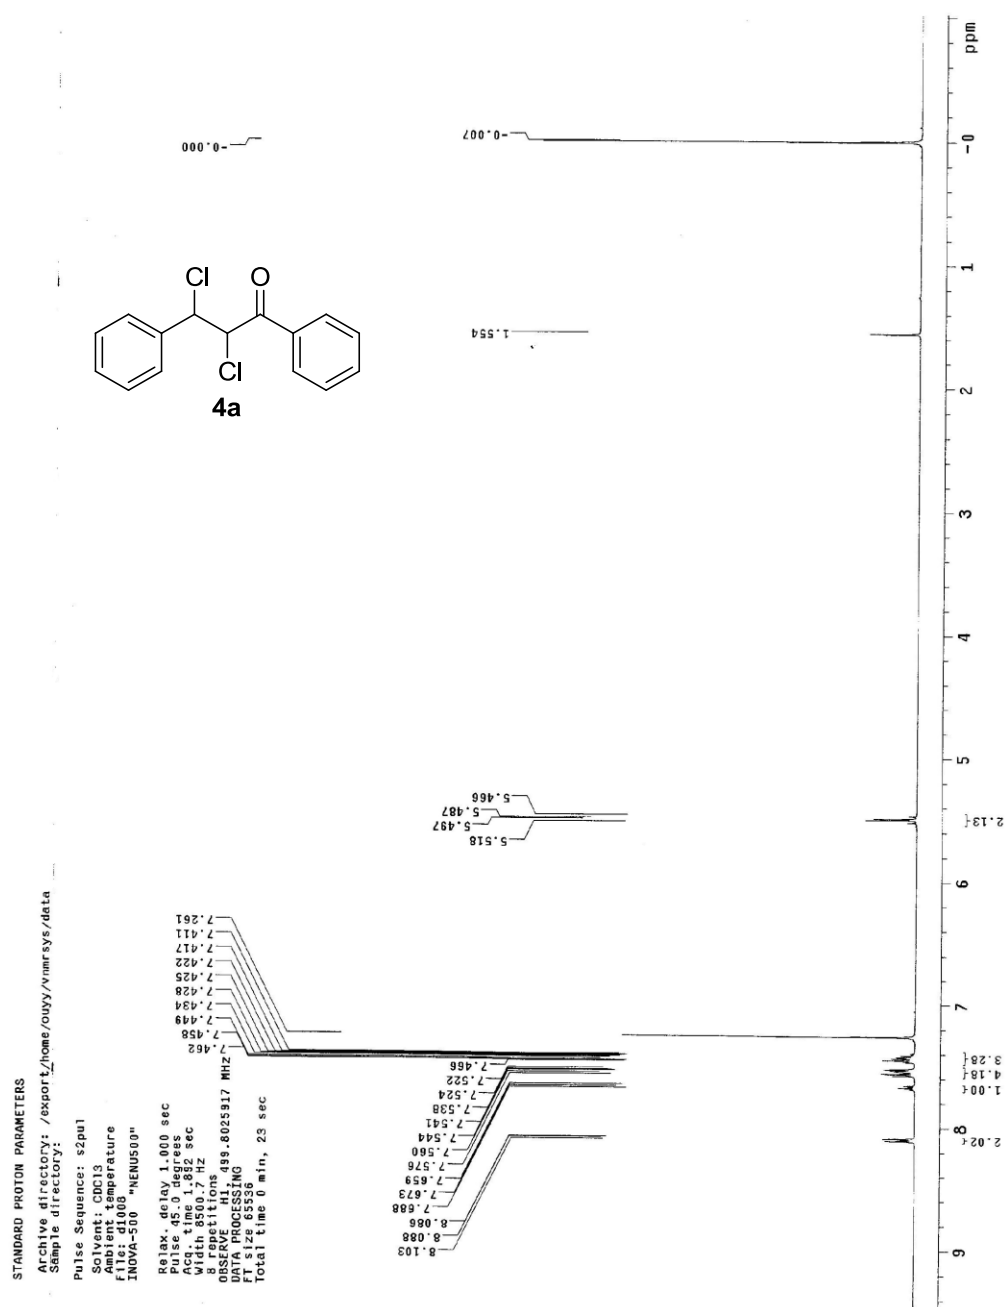

Electronic Supplementary Material (ESI) for RSC Advances  
This journal is © The Royal Society of Chemistry 2012

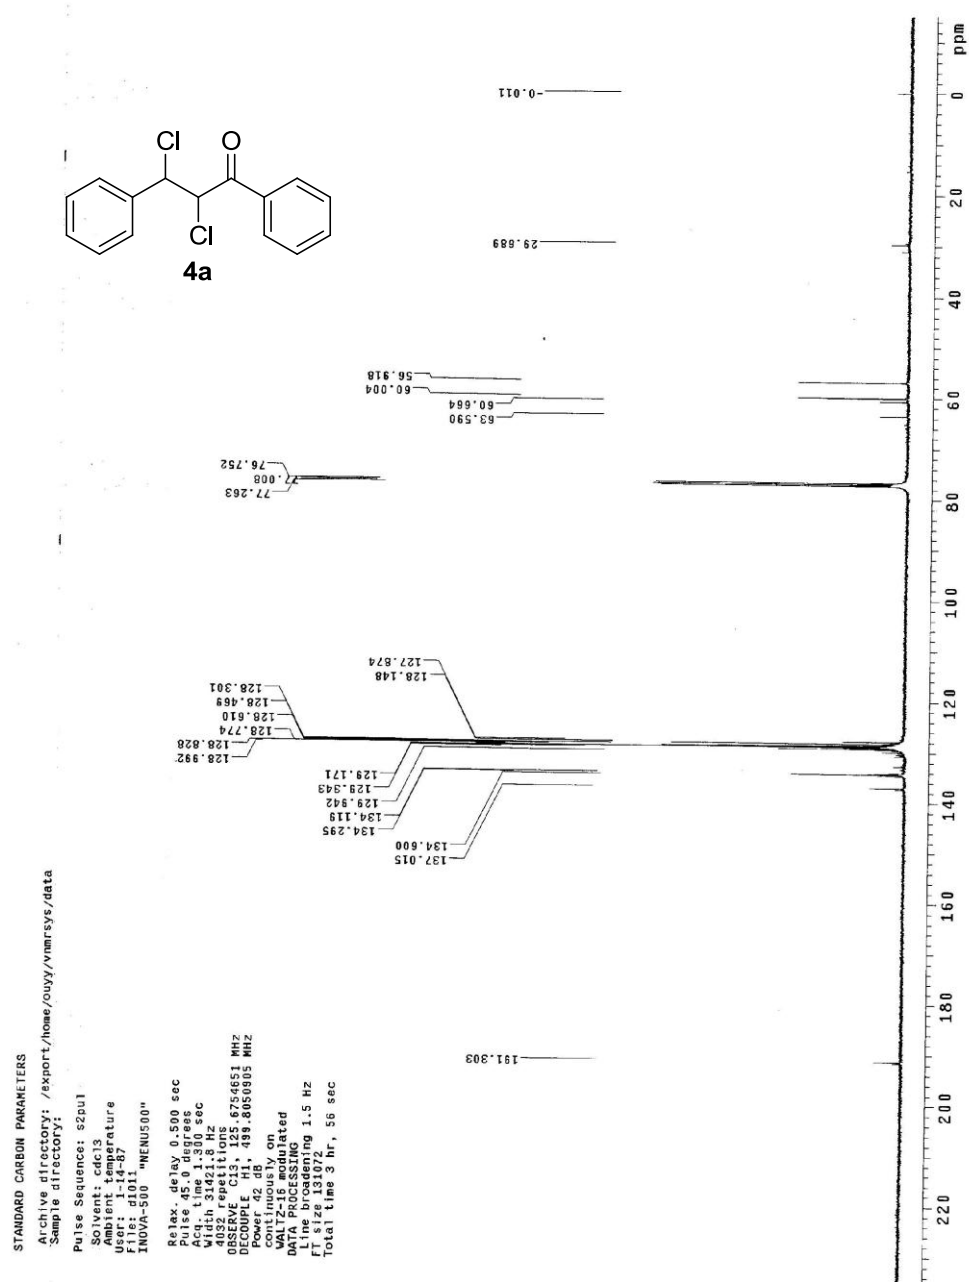

Electronic Supplementary Material (ESI) for RSC Advances  
This journal is © The Royal Society of Chemistry 2012

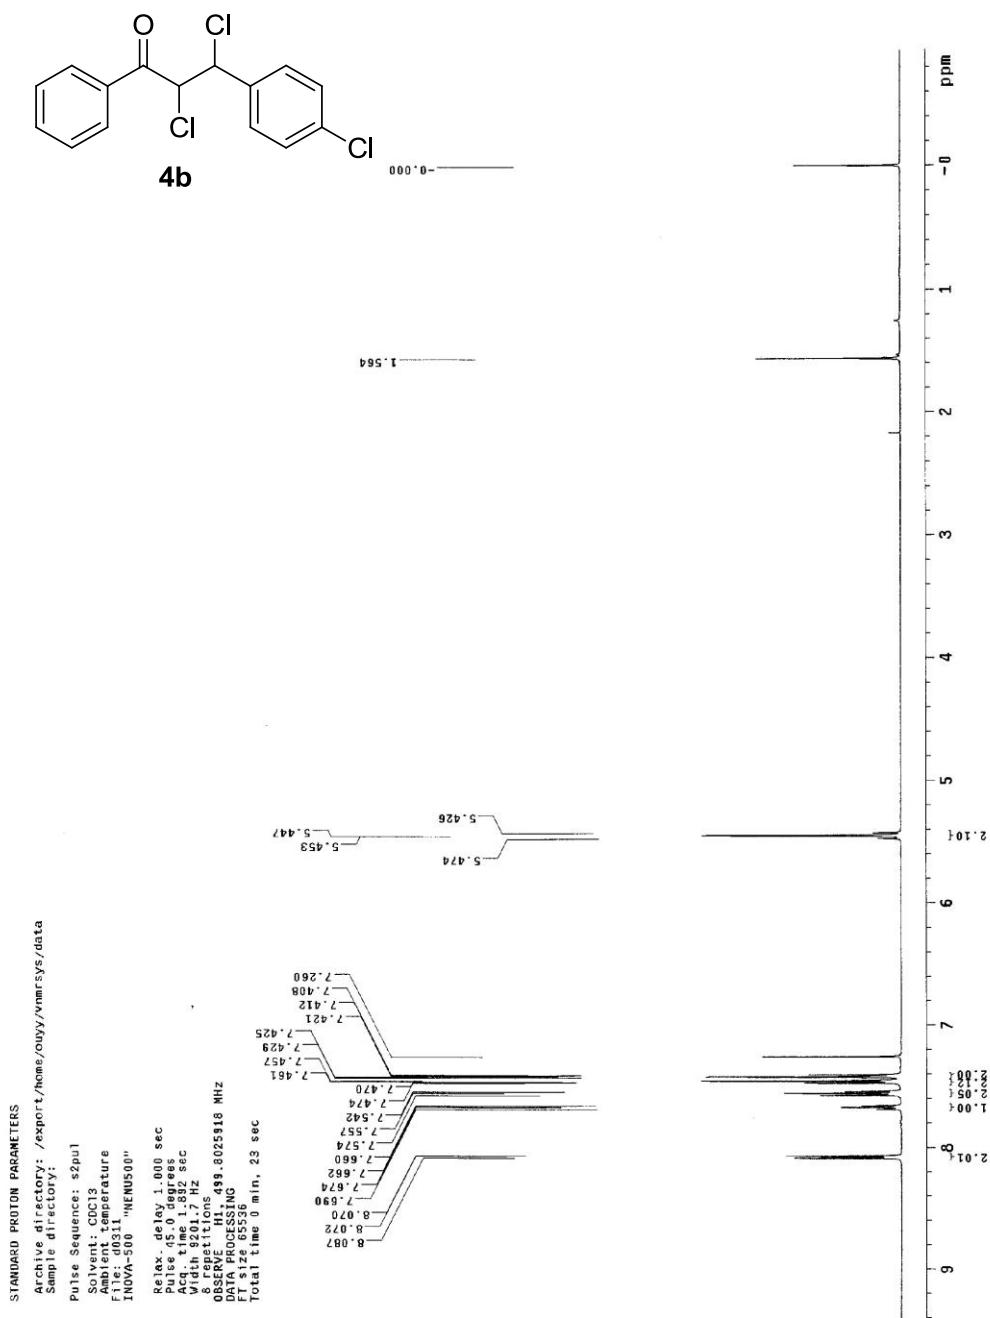

Supplement: c3ra40360b.pdf [file c3ra40360b.pdf]
